# Supplementary material for: Polyoxygenated Stigmastane-Type Steroids from Vernonia kotschyana Sch. Bip. ex Walp. and Their Chemophenetic Significance
Source: MDPI journal article supplement (doi:10.3390/molecules28135278), 2023-07-07
Supplement: s1 [file s1]

# Polyoxygenated stigmastane-type steroids from *Vernonia kotschyana* Sch. Bip. ex Walp. and their chemophenetic significance<sup>†</sup>

Nadine Tseme Wandji<sup>1,2,3</sup>, Gabin Thierry M. Bitchagno<sup>3,4</sup>, Isabelle Mawabo Kamga<sup>5</sup>, Joseph Tchamgoue<sup>1,2</sup>, Celine Nguefeu Nkenfou<sup>5,6</sup>, Bruno Ndjakou Lenta<sup>1</sup>, Norbert Sewald<sup>3,\*</sup>, Simeon Fogue Kouam<sup>1,\*</sup>

<sup>1</sup>Department of Chemistry, Higher Teacher Training College, University of Yaounde I, P.O. Box 47, Yaounde, Cameroon.

<sup>2</sup>Department of Organic Chemistry, Faculty of Science, University of Yaounde I, P.O. Box 812, Yaounde, Cameroon

<sup>3</sup>Organic and Bioorganic Chemistry, Faculty of Chemistry, Bielefeld University, D-33501 Bielefeld, Germany

<sup>4</sup>Department of Chemistry, University of Dschang, P.O. Box 67 Dschang, Cameroon

<sup>5</sup>Department of Biology, Higher Teacher Training College, University of Yaounde I, P.O. Box 47, Yaounde, Cameroon

<sup>6</sup>Molecular Biology Center, P. O. Box 14495 Yaounde, Cameroon

## Content

|                                                                                                                |   |
|----------------------------------------------------------------------------------------------------------------|---|
| <b>Figure S1:</b> IR spectrum of compound <b>1</b> .....                                                       | 3 |
| <b>Figure S2:</b> ESI-HR mass spectrum of compound <b>1</b> .....                                              | 3 |
| <b>Figure S3:</b> <sup>1</sup> H NMR (CDCl <sub>3</sub> , 500 MHz) spectrum of compound <b>1</b> .....         | 4 |
| <b>Figure S4:</b> <sup>13</sup> C NMR (CDCl <sub>3</sub> , 125 MHz) spectrum of compound <b>1</b> .....        | 4 |
| <b>Figure S5:</b> DEPT 135 spectrum of compound <b>1</b> .....                                                 | 5 |
| <b>Figure S6:</b> HSQC spectrum of compound <b>1</b> .....                                                     | 5 |
| <b>Figure S7:</b> HMBC spectrum of compound <b>1</b> .....                                                     | 6 |
| <b>Figure S8:</b> COSY spectrum of compound <b>1</b> .....                                                     | 6 |
| <b>Figure S9:</b> ROESY spectrum of compound <b>1</b> .....                                                    | 7 |
| <b>Figure S10:</b> ESI-HR mass spectrum of compound <b>1a</b> .....                                            | 7 |
| <b>Figure S11:</b> <sup>1</sup> H NMR (acetone-d <sub>6</sub> , 600 MHz) spectrum of compound <b>1a</b> .....  | 8 |
| <b>Figure S12:</b> <sup>13</sup> C NMR (acetone-d <sub>6</sub> , 150 MHz) spectrum of compound <b>1a</b> ..... | 8 |
| <b>Figure S13:</b> COSY spectrum of compound <b>1a</b> .....                                                   | 9 |
| <b>Figure S14:</b> HSQC spectrum of compound <b>1a</b> .....                                                   | 9 |

|                                                                                                                       |    |
|-----------------------------------------------------------------------------------------------------------------------|----|
| <b>Figure S15:</b> HMBC spectrum of compound <b>1a</b> .....                                                          | 10 |
| <b>Figure S16:</b> NOESY spectrum of <b>1a</b> .....                                                                  | 10 |
| <b>Figure S17:</b> ESI-HR mass spectrum of compound <b>2</b> .....                                                    | 11 |
| <b>Figure S18:</b> IR spectrum of compound <b>2</b> .....                                                             | 11 |
| <b>Figure S19:</b> $^1\text{H}$ NMR ( $\text{CDCl}_3$ , 500 MHz) spectrum of compound <b>2</b> .....                  | 12 |
| <b>Figure S20:</b> $^{13}\text{C}$ NMR ( $\text{CDCl}_3$ , 125 MHz) spectrum of compound <b>2</b> .....               | 12 |
| <b>Figure S21:</b> DEPT 135 spectrum of compound <b>2</b> .....                                                       | 13 |
| <b>Figure S22:</b> HMBC spectrum of compound <b>2</b> .....                                                           | 13 |
| <b>Figure S23:</b> COSY spectrum of compound <b>2</b> .....                                                           | 14 |
| <b>Figure S24:</b> ROESY spectrum of compound <b>2</b> .....                                                          | 14 |
| <b>Figure S25:</b> ESI-HR mass spectrum of compound <b>3</b> .....                                                    | 15 |
| <b>Figure S26:</b> IR spectrum of compound <b>3</b> .....                                                             | 15 |
| <b>Figure S27:</b> $^1\text{H}$ NMR ( $\text{CDCl}_3$ , 600 MHz) spectrum of compound <b>3</b> .....                  | 16 |
| <b>Figure S28:</b> $^{13}\text{C}$ ( $\text{CDCl}_3$ , 150 MHz) spectrum of compound <b>3</b> .....                   | 16 |
| <b>Figure S29:</b> DEPT 135 spectrum of compound <b>3</b> .....                                                       | 17 |
| <b>Figure S30:</b> HSQC spectrum of compound <b>3</b> .....                                                           | 17 |
| <b>Figure S31:</b> HMBC spectrum of compound <b>3</b> .....                                                           | 18 |
| <b>Figure S32:</b> COSY spectrum of compound <b>3</b> .....                                                           | 18 |
| <b>Figure S33:</b> ROESY spectrum of compound <b>3</b> .....                                                          | 19 |
| <b>Figure S34:</b> ESI-HR mass spectrum of compound <b>4</b> .....                                                    | 19 |
| <b>Figure S35:</b> IR spectrum of compound <b>4</b> .....                                                             | 20 |
| <b>Figure S36:</b> $^1\text{H}$ NMR ( $\text{CDCl}_3$ , 500 MHz) spectrum of compound <b>4</b> .....                  | 20 |
| <b>Figure S37:</b> $^{13}\text{C}$ NMR ( $\text{CDCl}_3$ , 125 MHz) spectrum of compound <b>4</b> .....               | 21 |
| <b>Figure S38:</b> HSQC spectrum of compound <b>4</b> .....                                                           | 21 |
| <b>Figure S39:</b> HMBC spectrum of compound <b>4</b> .....                                                           | 22 |
| <b>Figure S40:</b> COSY spectrum of compound <b>4</b> .....                                                           | 22 |
| <b>Figure S41:</b> ROESY spectrum of compound <b>4</b> .....                                                          | 23 |
| <b>Figure S42:</b> $^1\text{H}$ NMR ( $\text{CD}_3\text{OD}$ , 500 MHz) spectrum of compound <b>5</b> .....           | 23 |
| <b>Figure S43:</b> $^1\text{H}$ NMR ( $\text{CDCl}_3$ , 500 MHz) spectrum of compound <b>6</b> .....                  | 24 |
| <b>Figure S44:</b> $^{13}\text{C}$ NMR ( $\text{CDCl}_3$ , 125 MHz) spectrum of compound <b>6</b> .....               | 24 |
| <b>Figure S45:</b> $^1\text{H}$ NMR ( $\text{CDCl}_3$ , 500 MHz) spectrum of a mixture of <b>7</b> and <b>8</b> ..... | 25 |

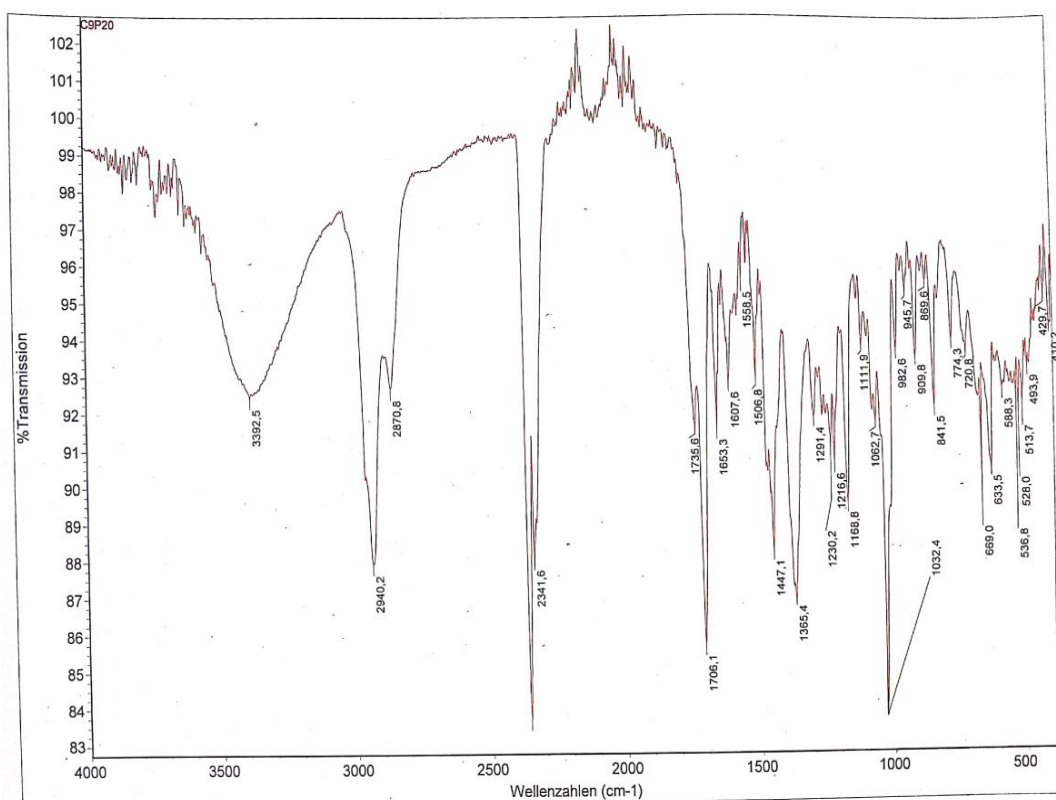

**Figure S1:** IR spectrum of compound 1

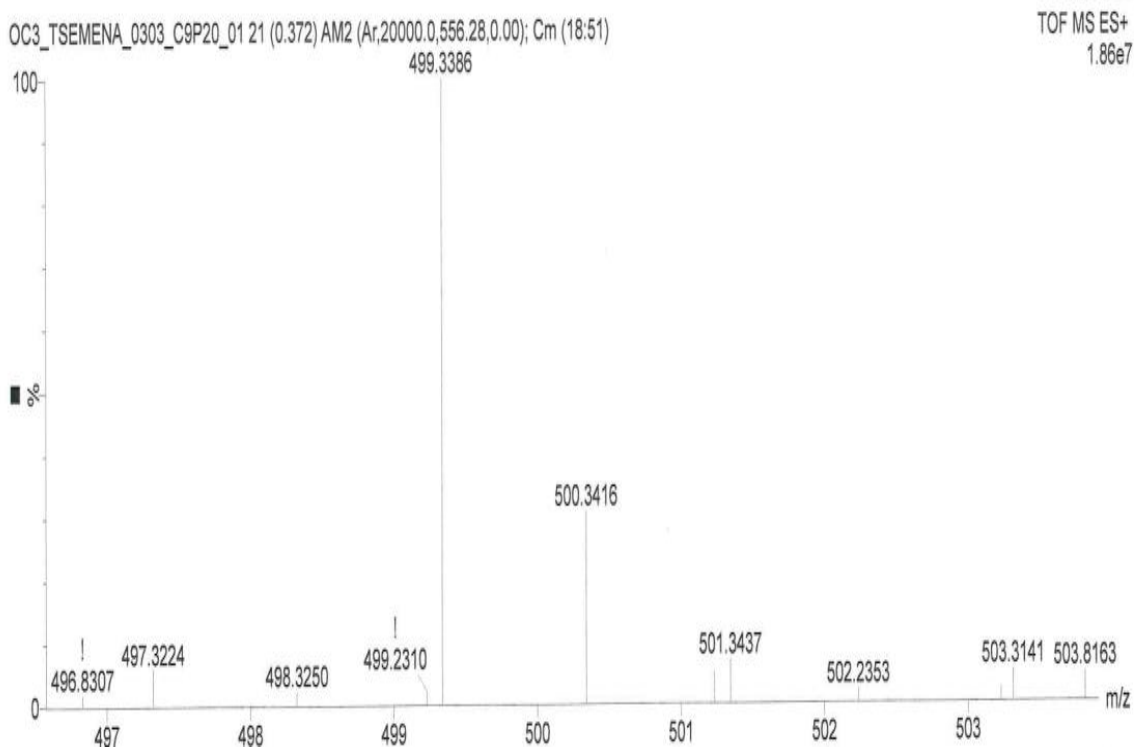

**Figure S2:** ESI-HR mass spectrum of compound 1

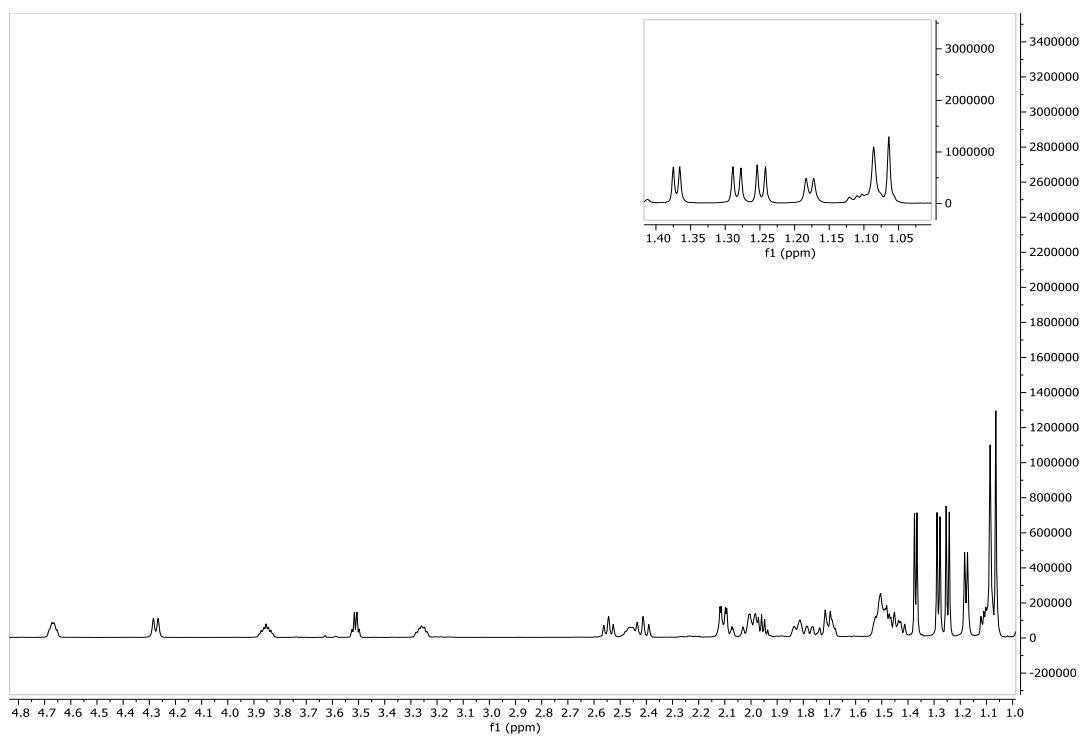

**Figure S3:**  $^1\text{H}$  NMR ( $\text{CDCl}_3$ , 500 MHz) spectrum of compound **1**

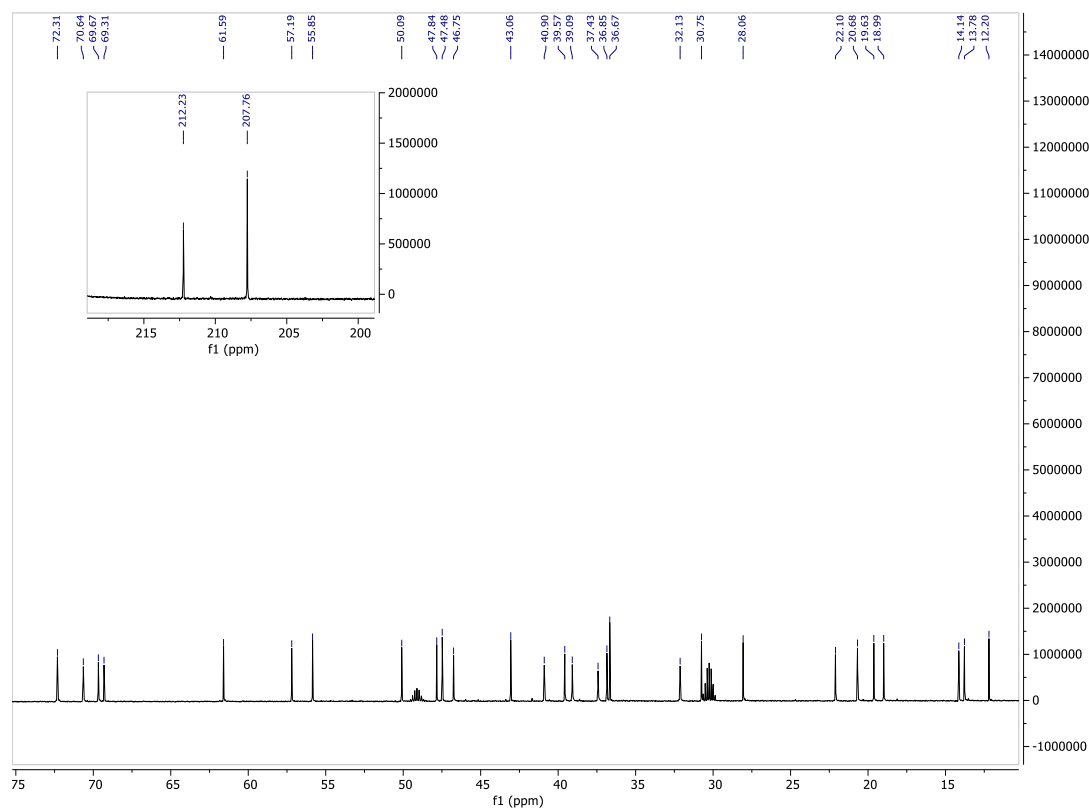

**Figure S4:**  $^{13}\text{C}$  NMR ( $\text{CDCl}_3$ , 125 MHz) spectrum of compound **1**



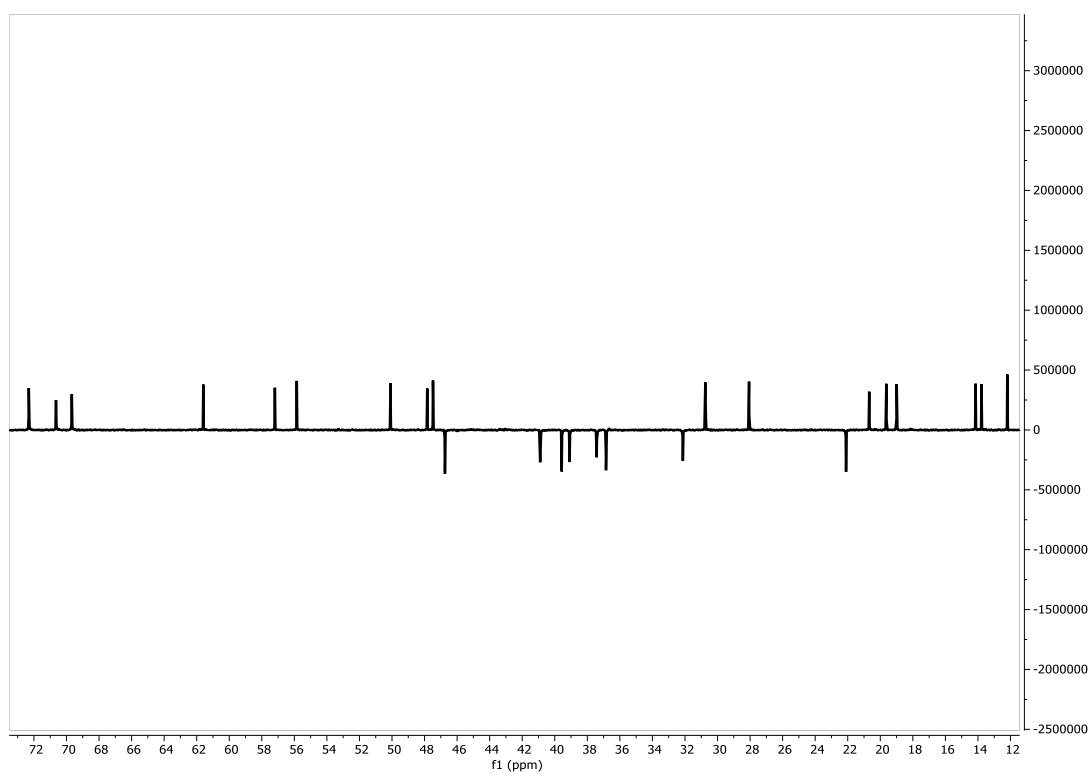

**Figure S5:** DEPT 135 spectrum of compound **1**

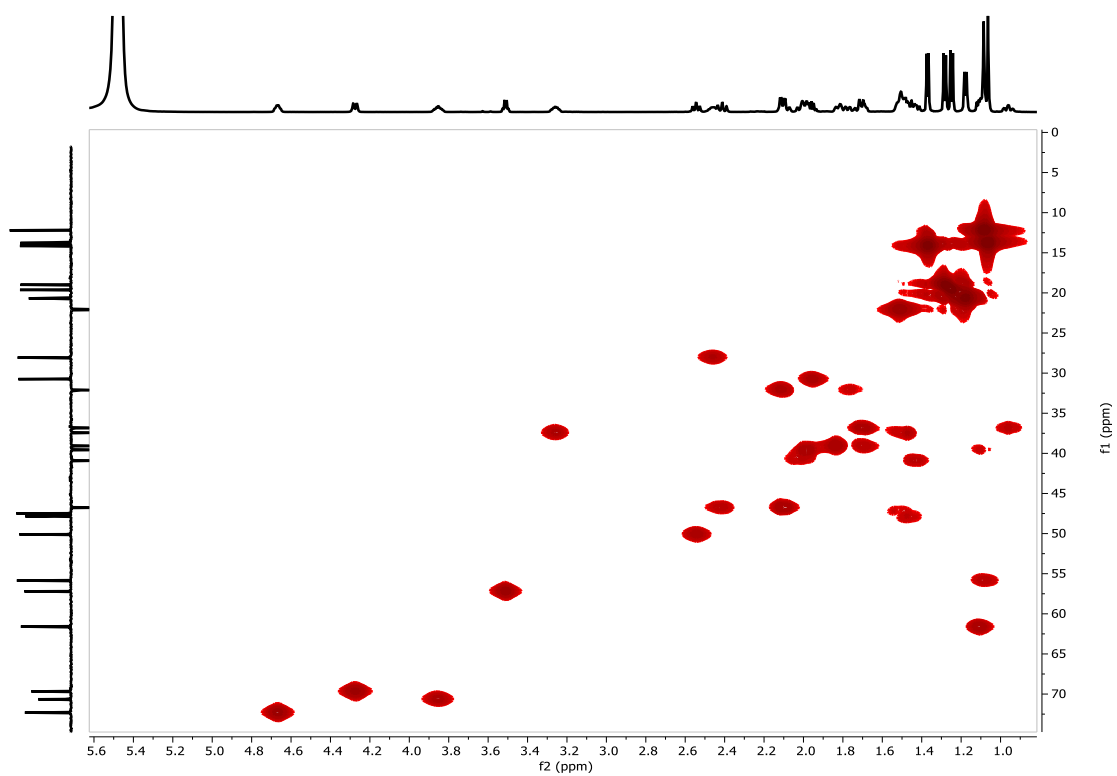

**Figure S6:** HSQC spectrum of compound **1**

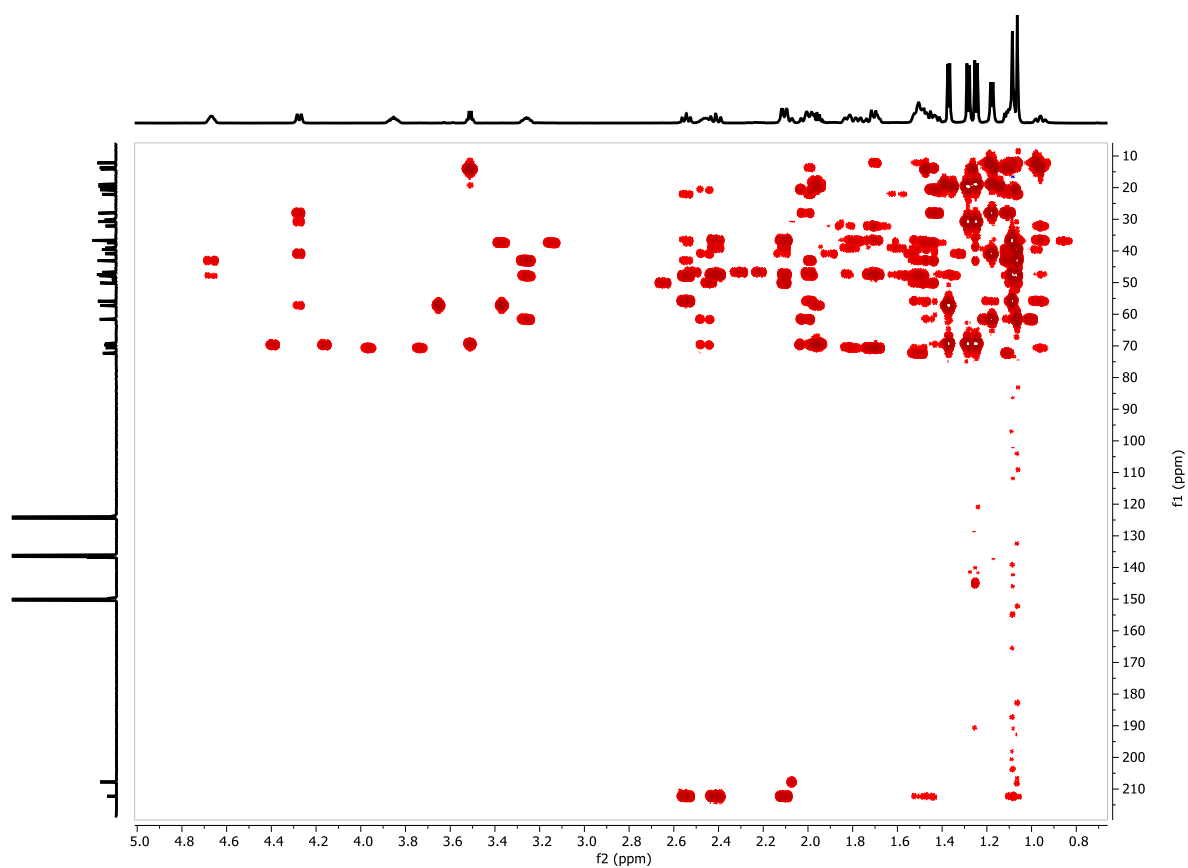

**Figure S7:** HMBC spectrum of compound 1

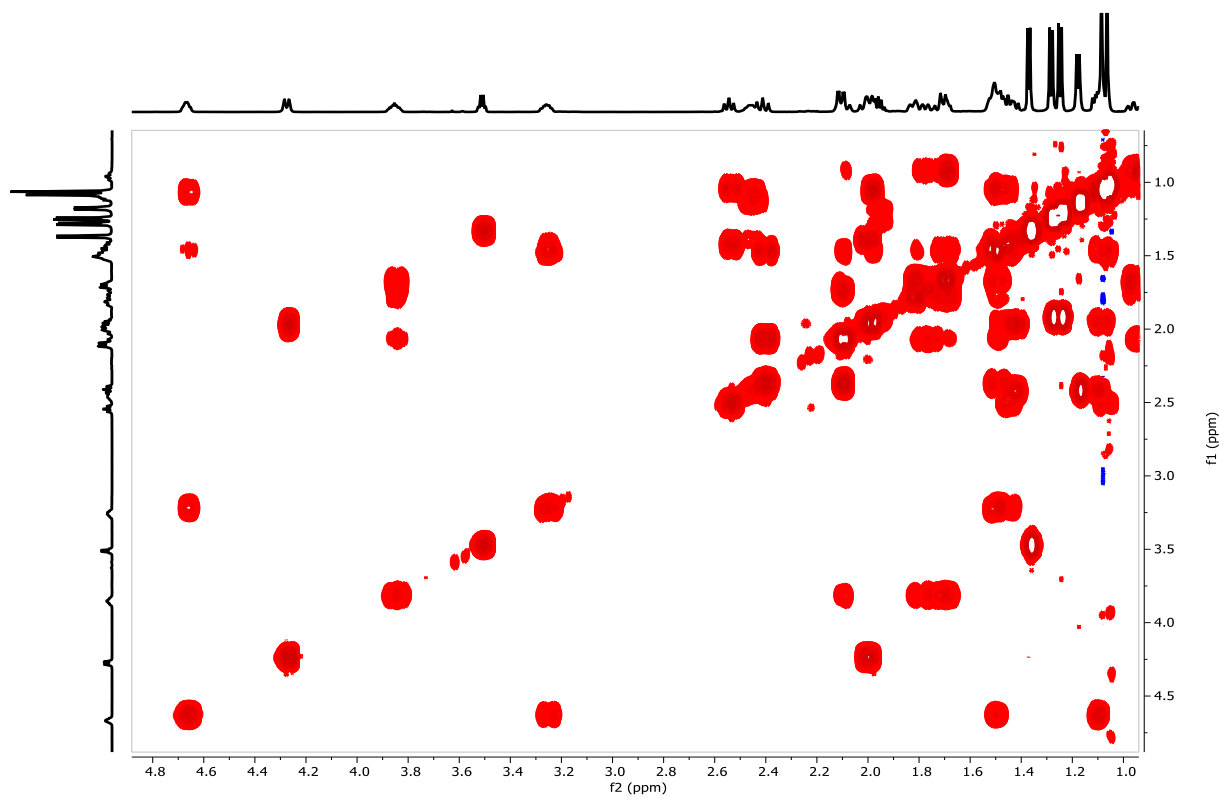

**Figure S8:** COSY spectrum of compound 1

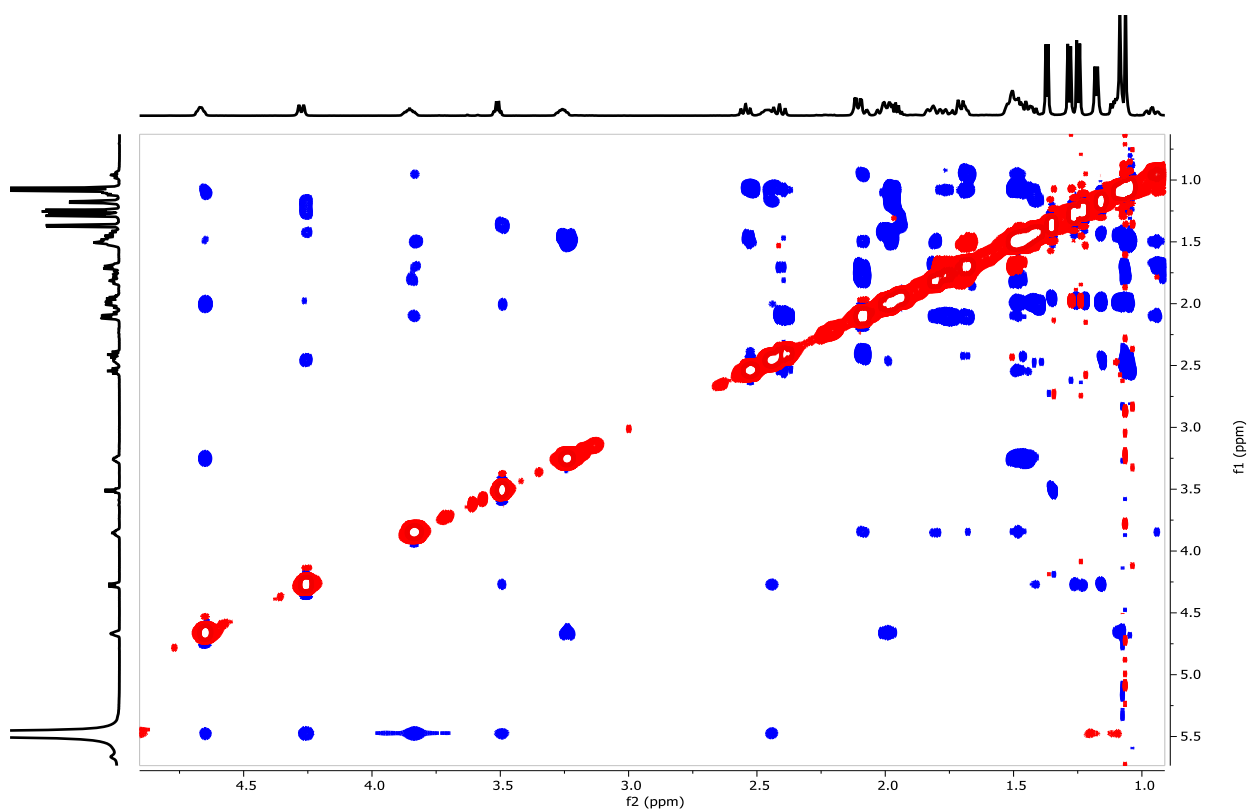

**Figure S9:** ROESY spectrum of compound 1

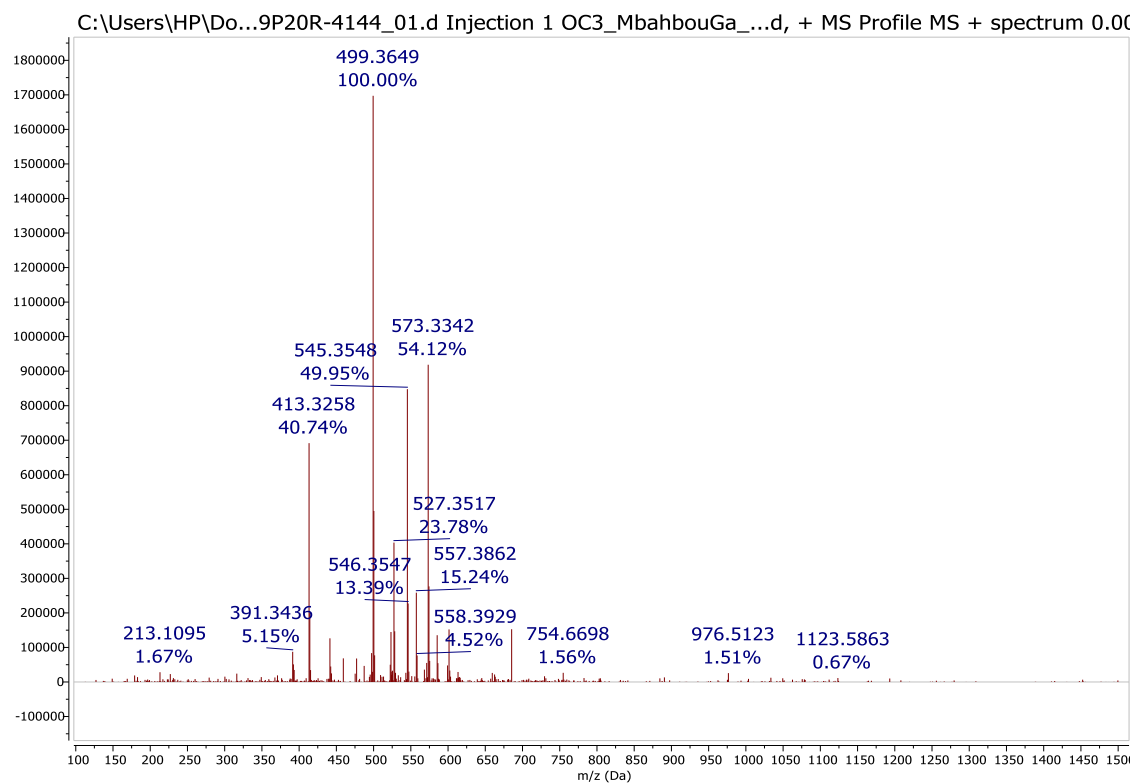

**Figure S10:** ESI-HR mass spectrum of compound 1a

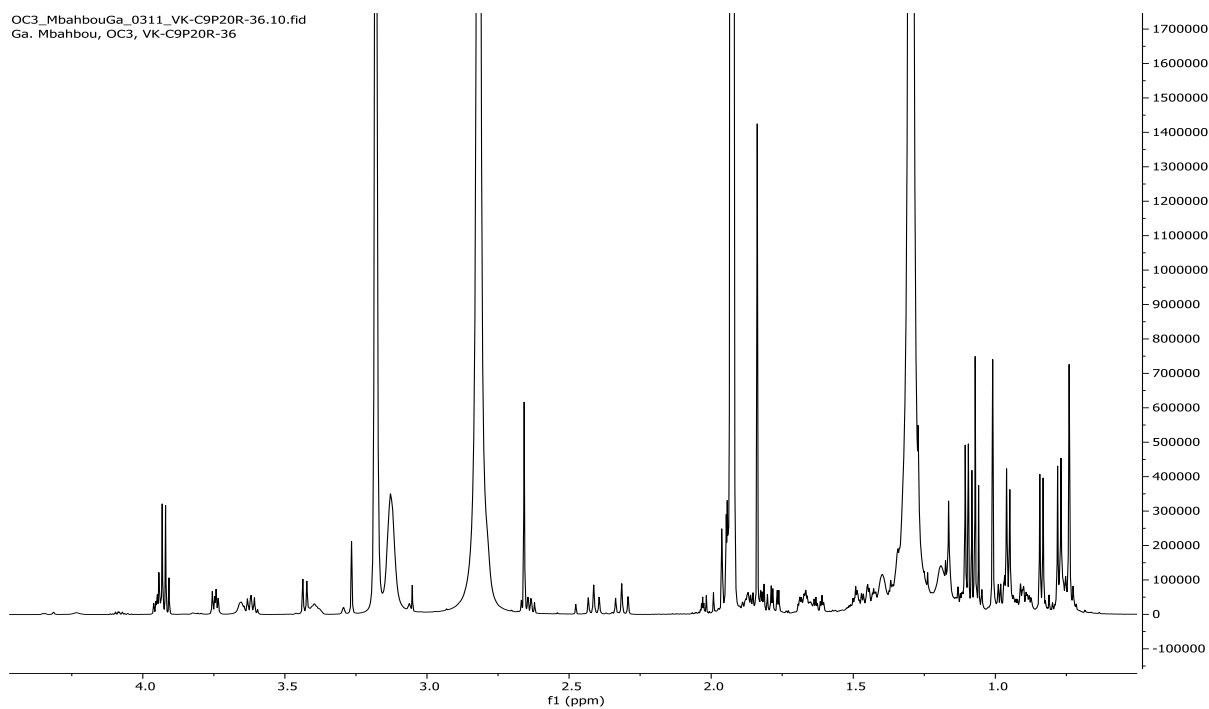

**Figure S11:**  $^1\text{H}$  NMR (acetone- $\text{d}_6$ , 600 MHz) spectrum of compound **1a**

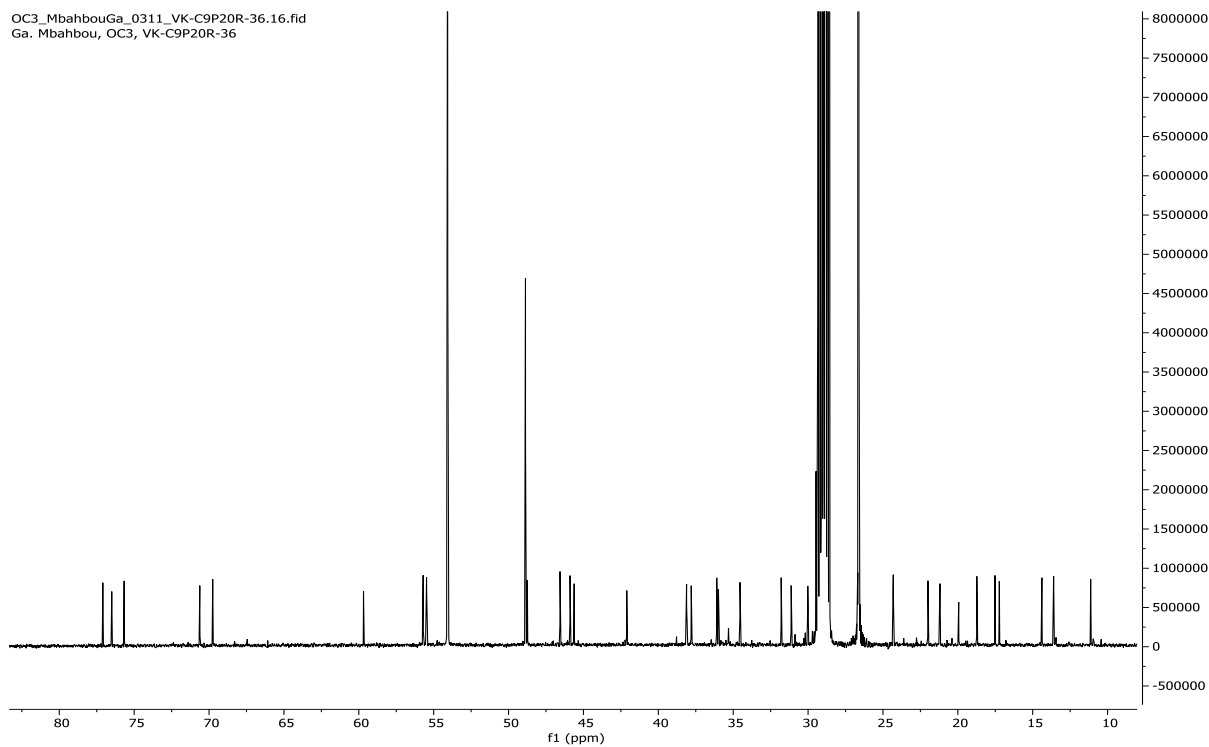

**Figure S12:**  $^{13}\text{C}$  NMR (acetone- $\text{d}_6$ , 150 MHz) spectrum of compound **1a**

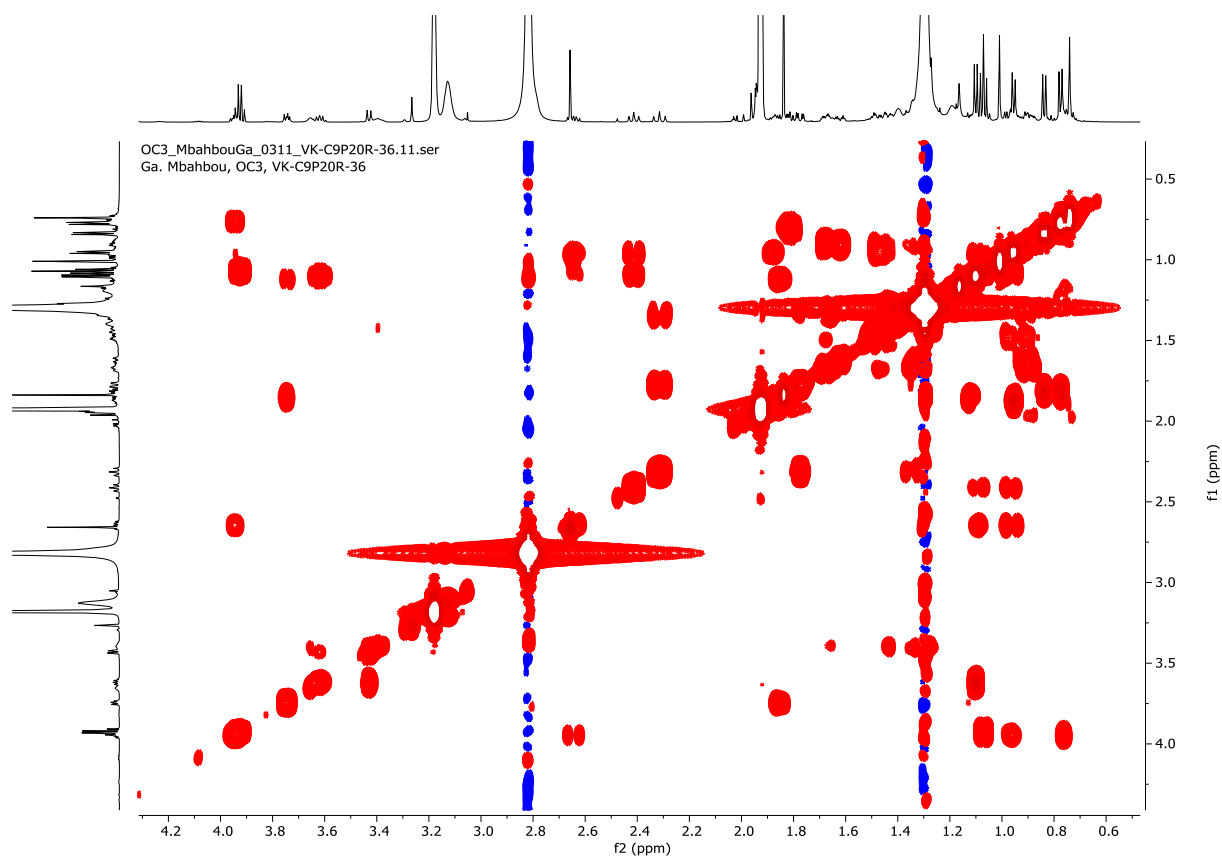

**Figure S13:** COSY spectrum of compound **1a**

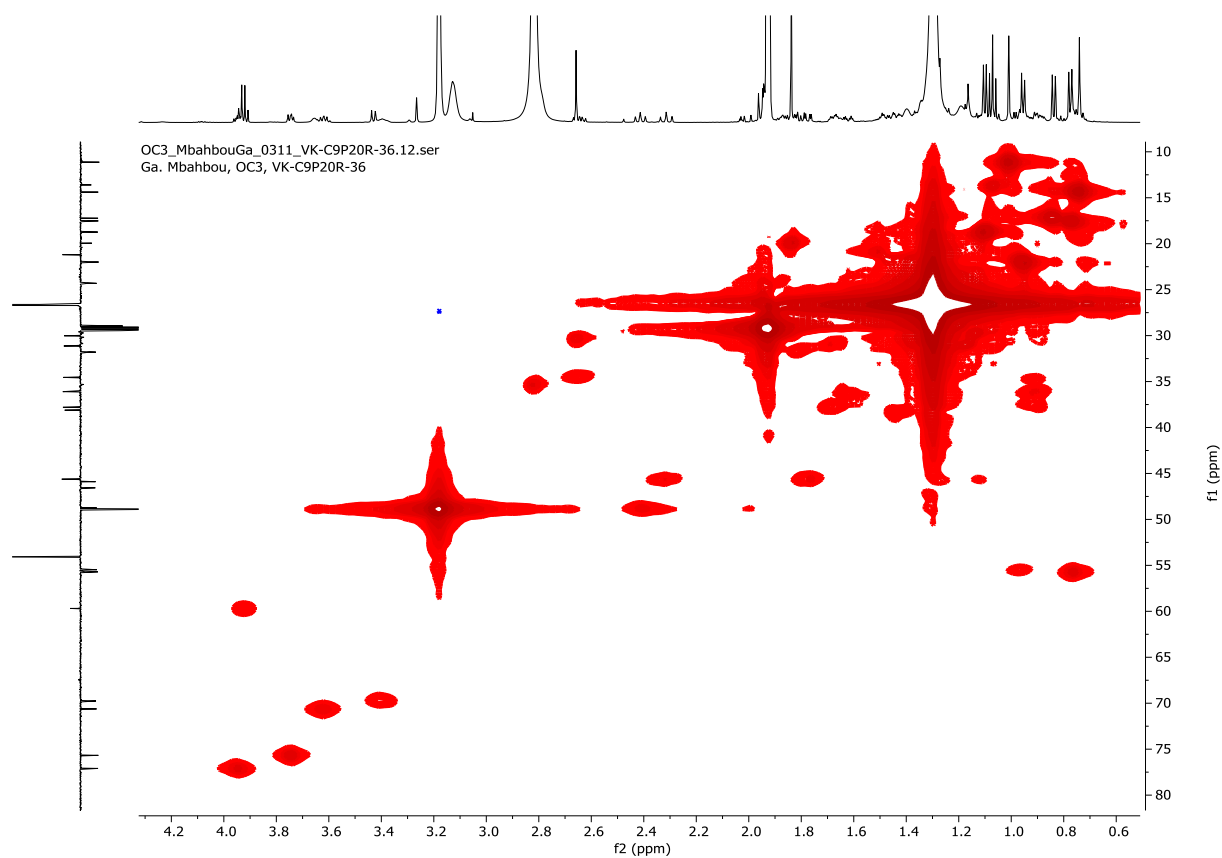

**Figure S14:** HSQC spectrum of compound **1a**

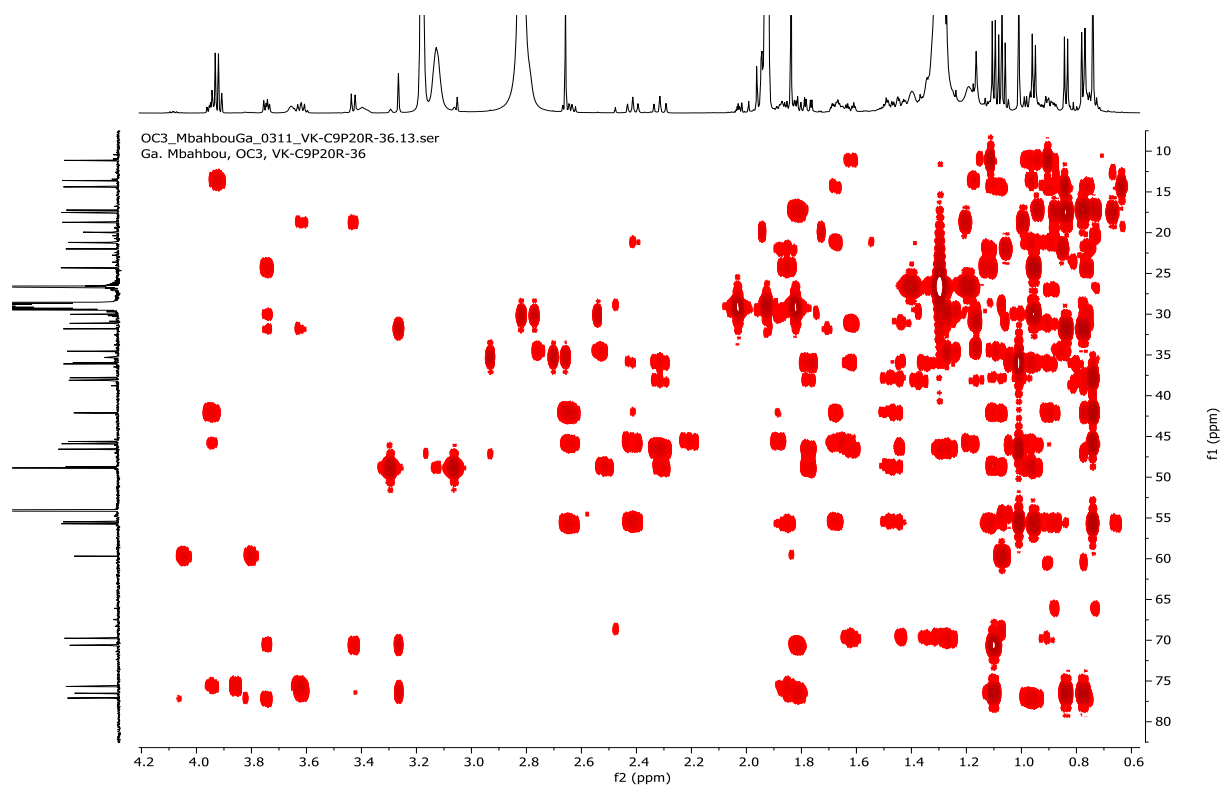

**Figure S15:** HMBC spectrum of compound **1a**

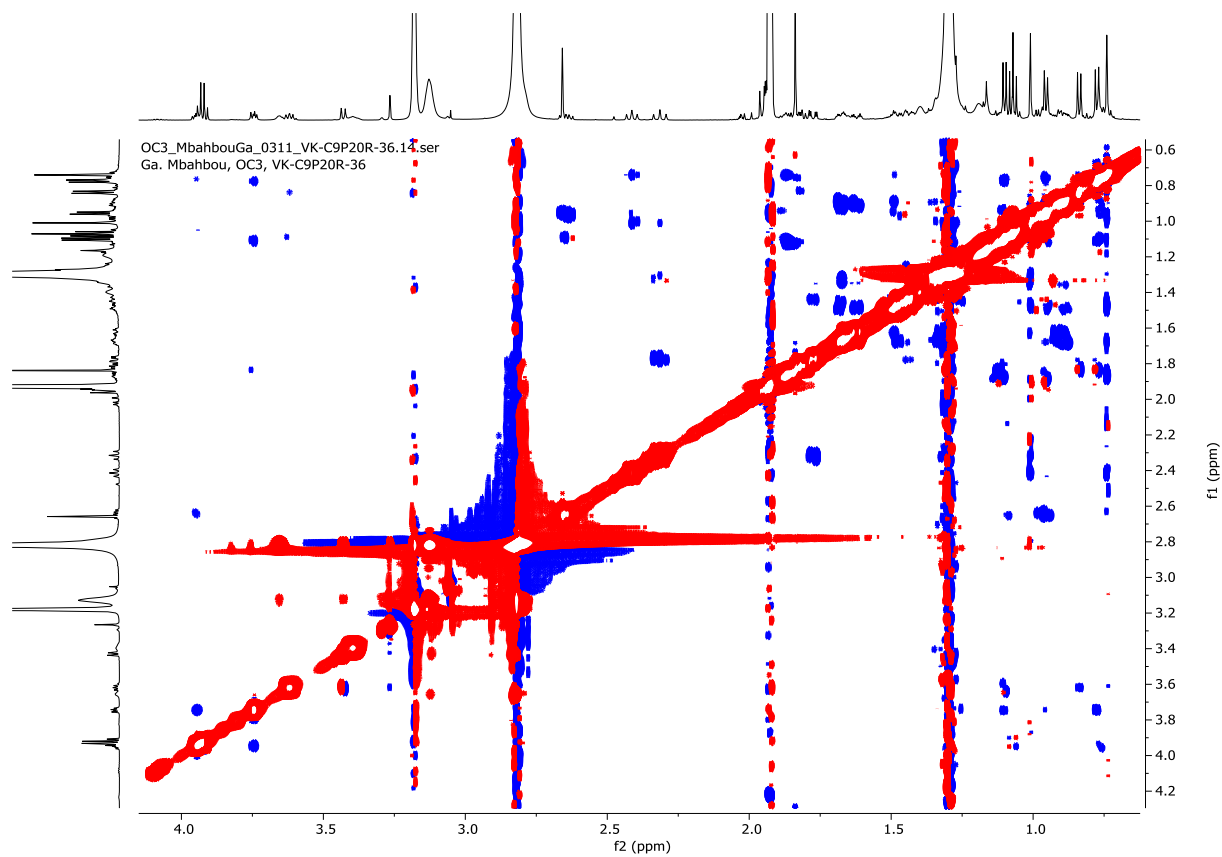

**Figure S16:** NOESY spectrum of **1a**

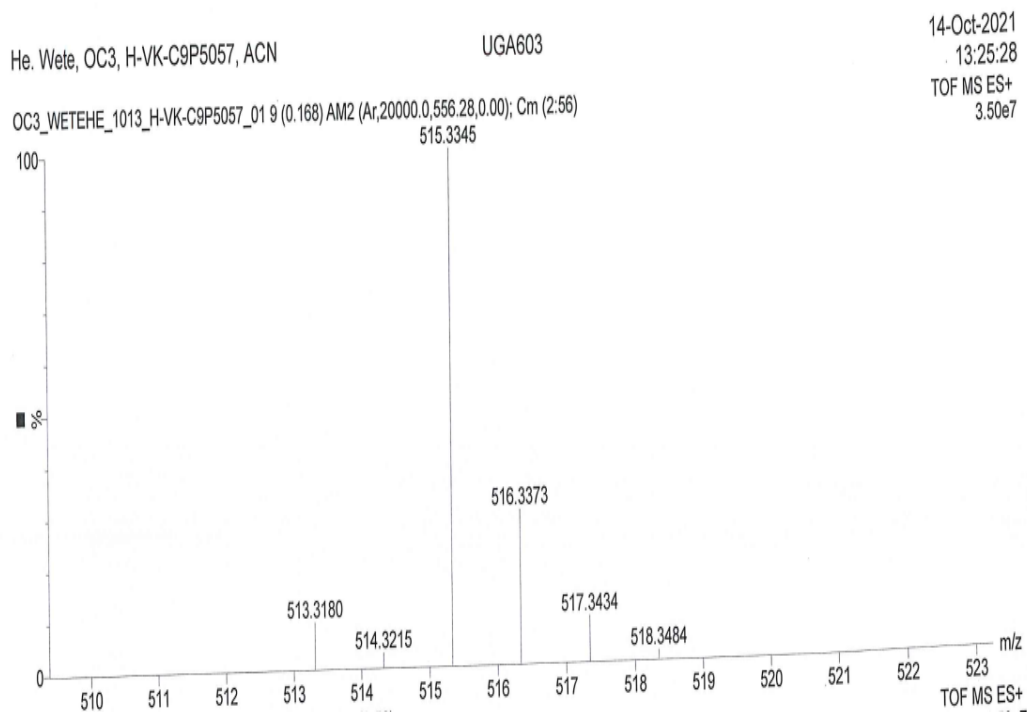

**Figure S17:** ESI-HR mass spectrum of compound 2

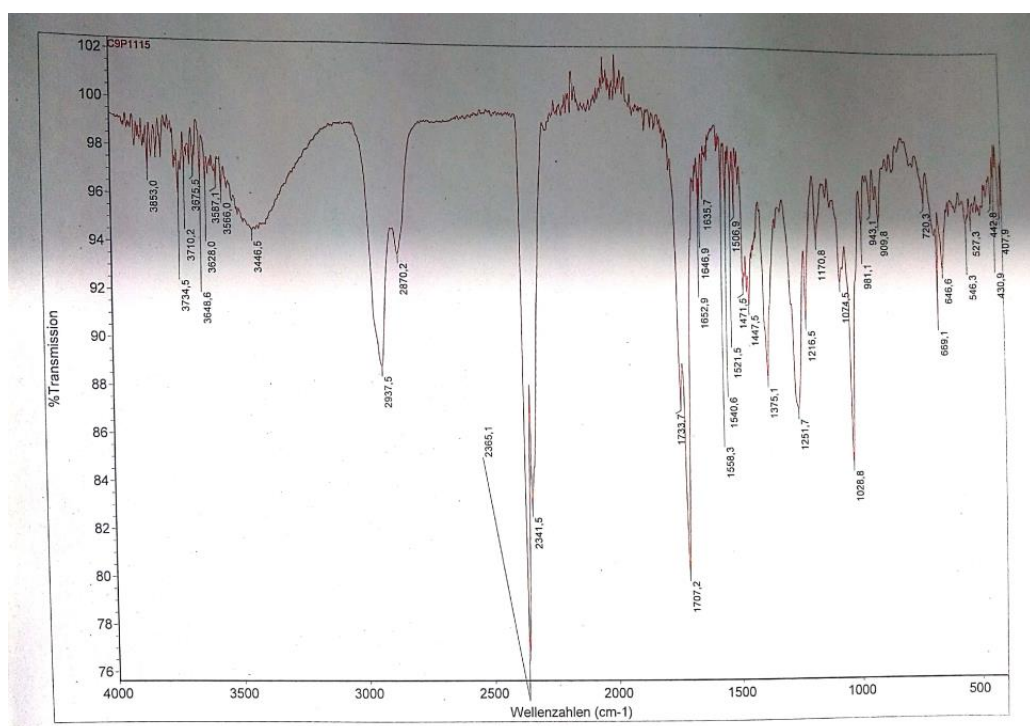

**Figure S18:** IR spectrum of compound 2

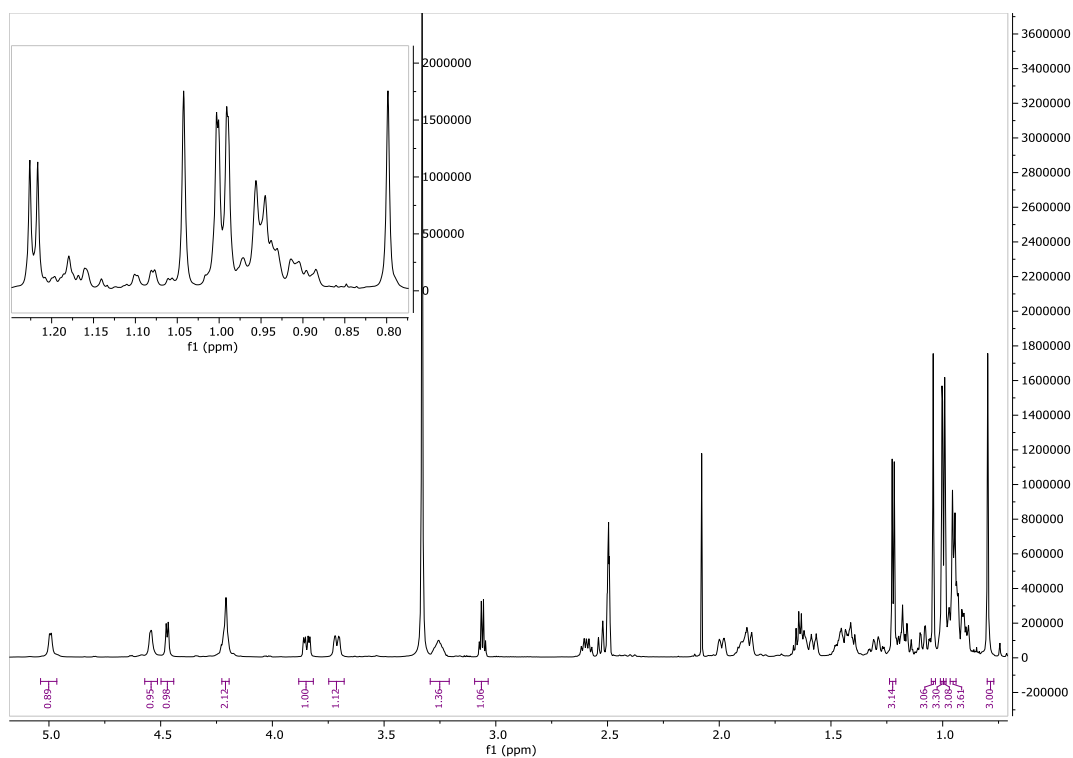

**Figure S19:**  $^1\text{H}$  NMR ( $\text{CDCl}_3$ , 500 MHz) spectrum of compound 2

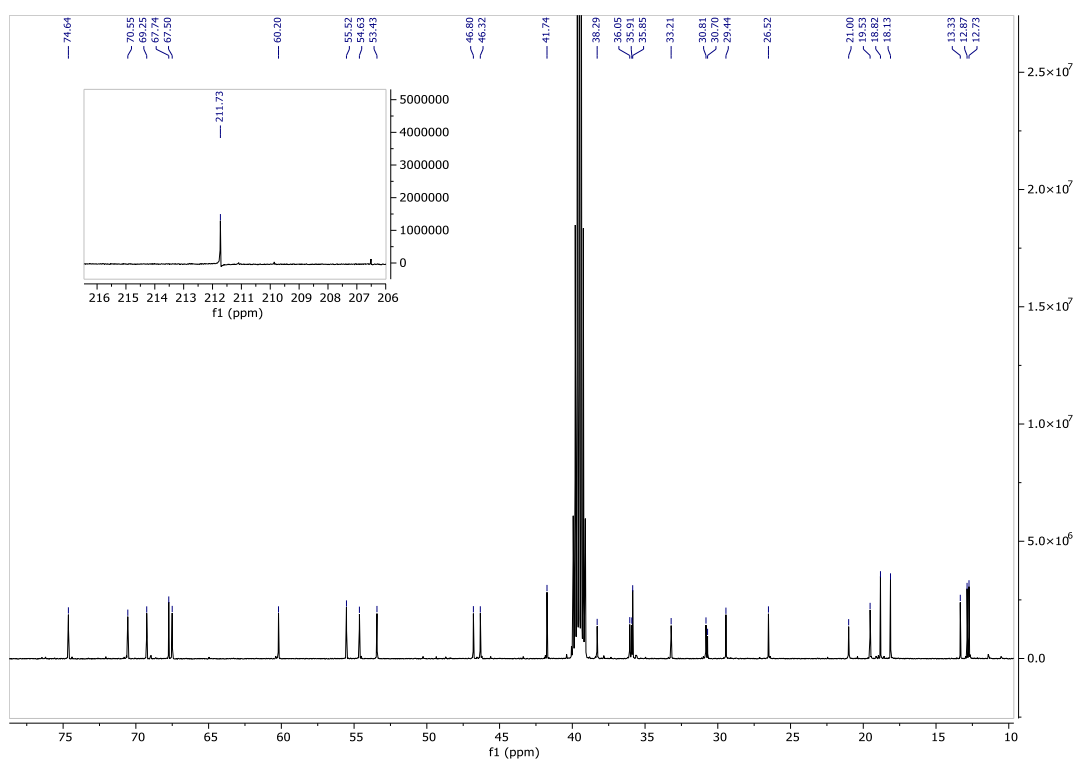

**Figure S20:**  $^{13}\text{C}$  NMR ( $\text{CDCl}_3$ , 125 MHz) spectrum of compound 2



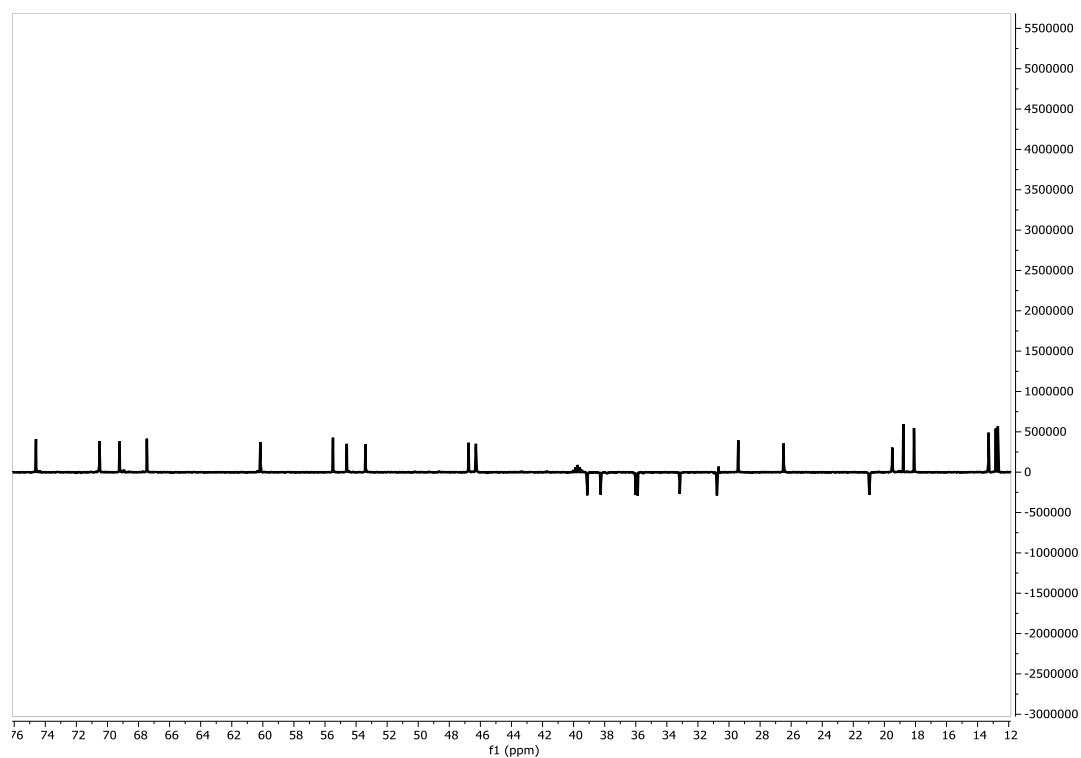

**Figure S21:** DEPT 135 spectrum of compound 2

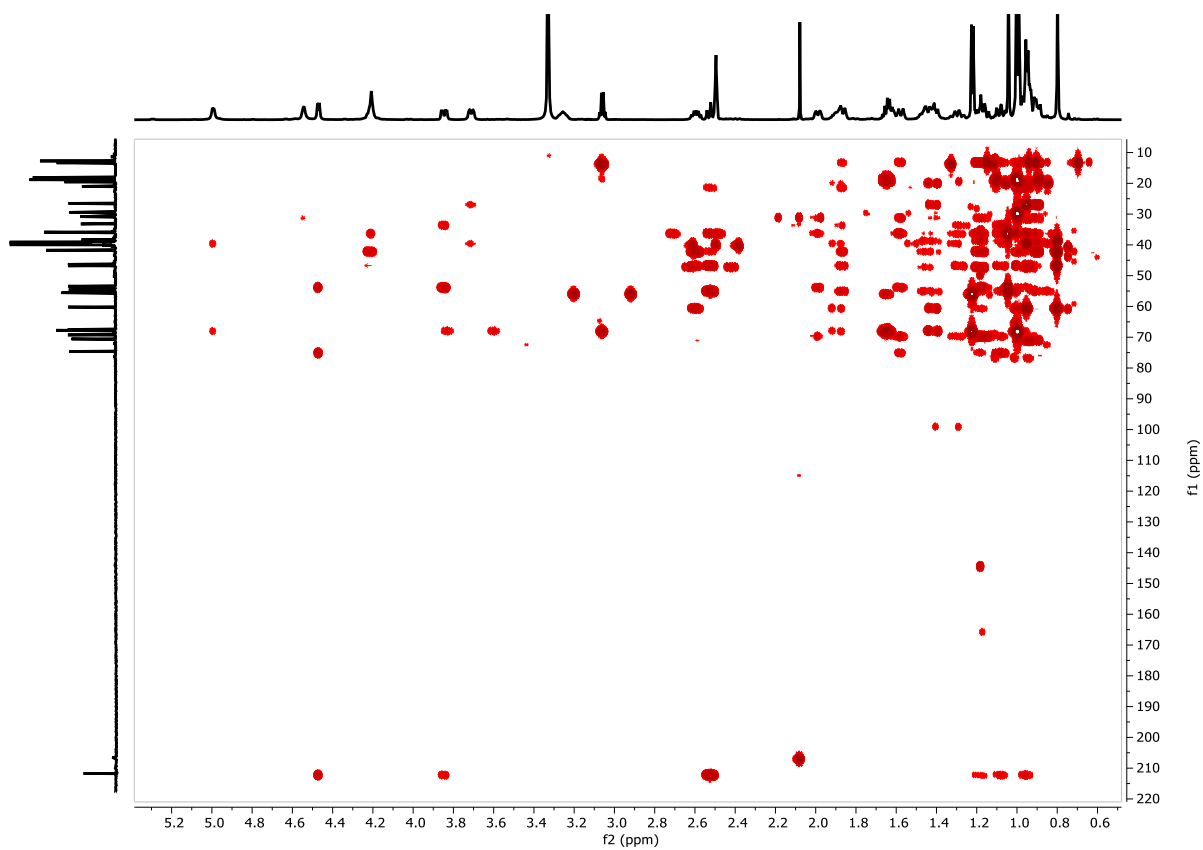

**Figure S22:** HMBC spectrum of compound 2

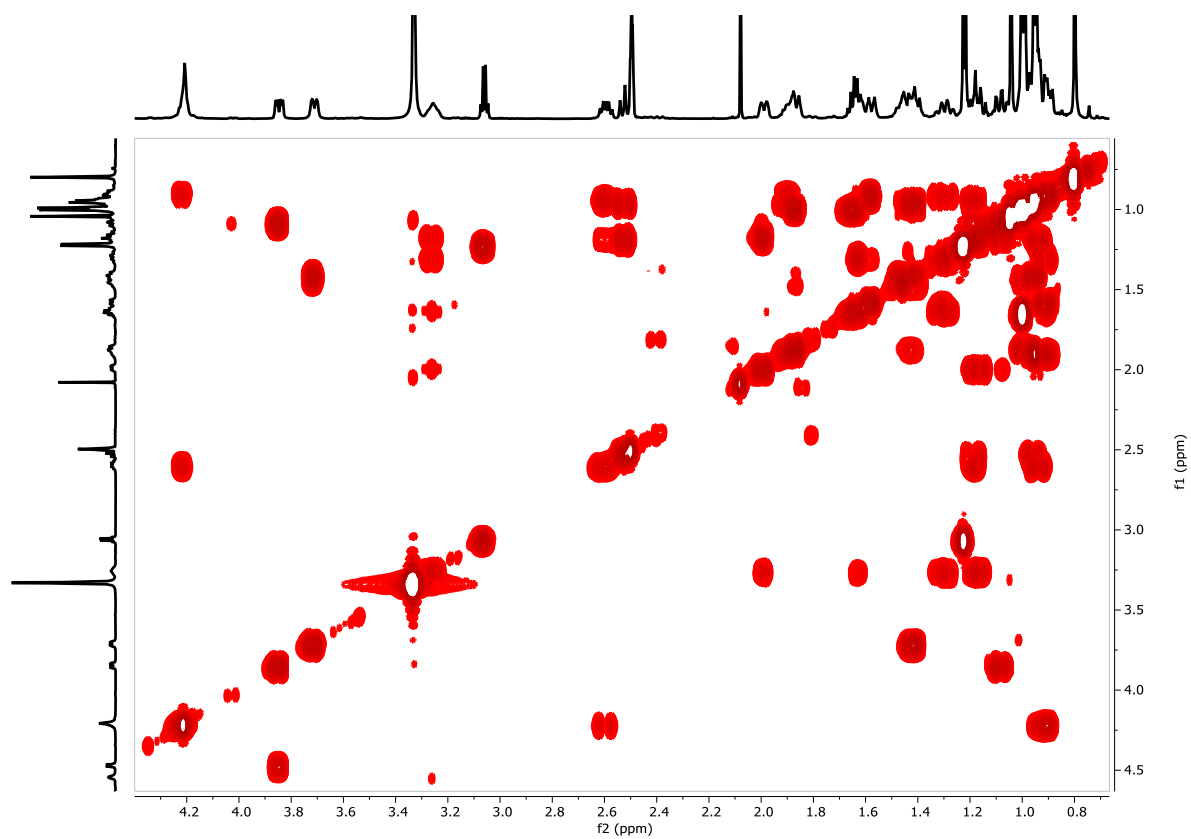

Figure S23: COSY spectrum of compound 2

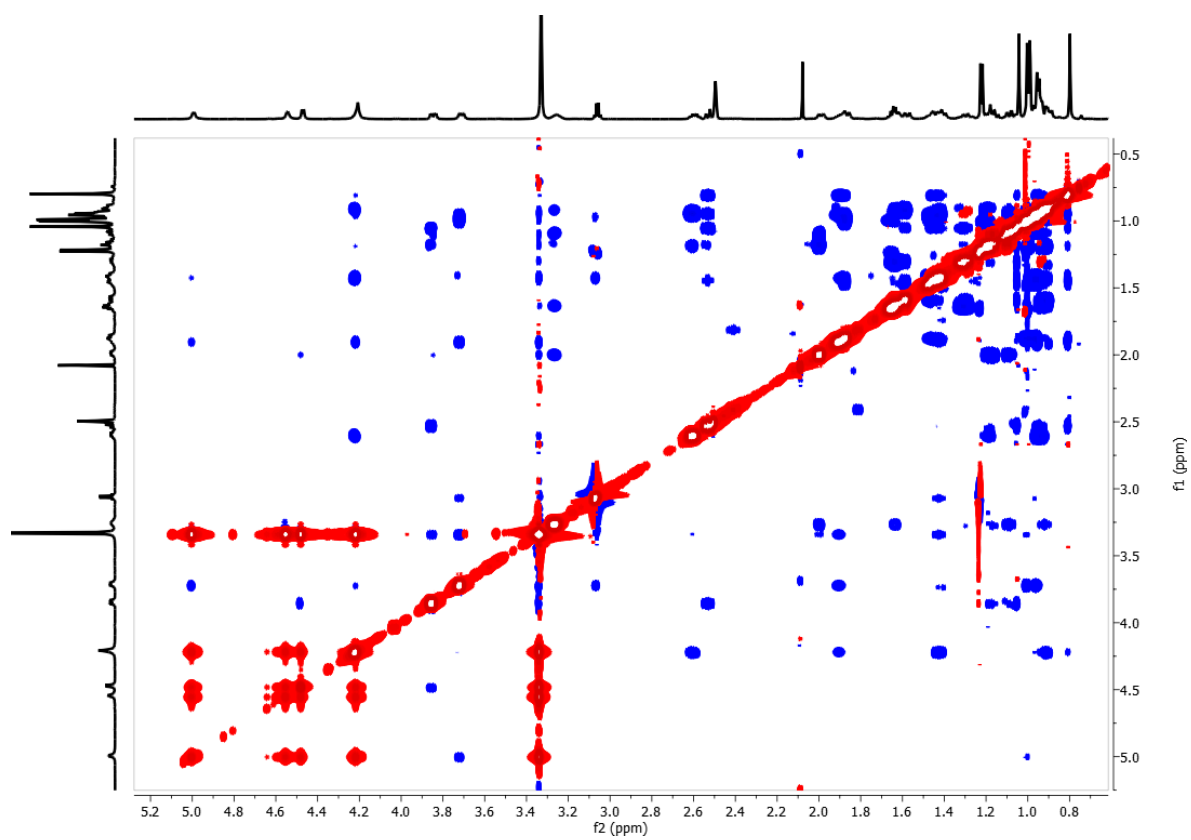

Figure S24: ROESY spectrum of compound 2

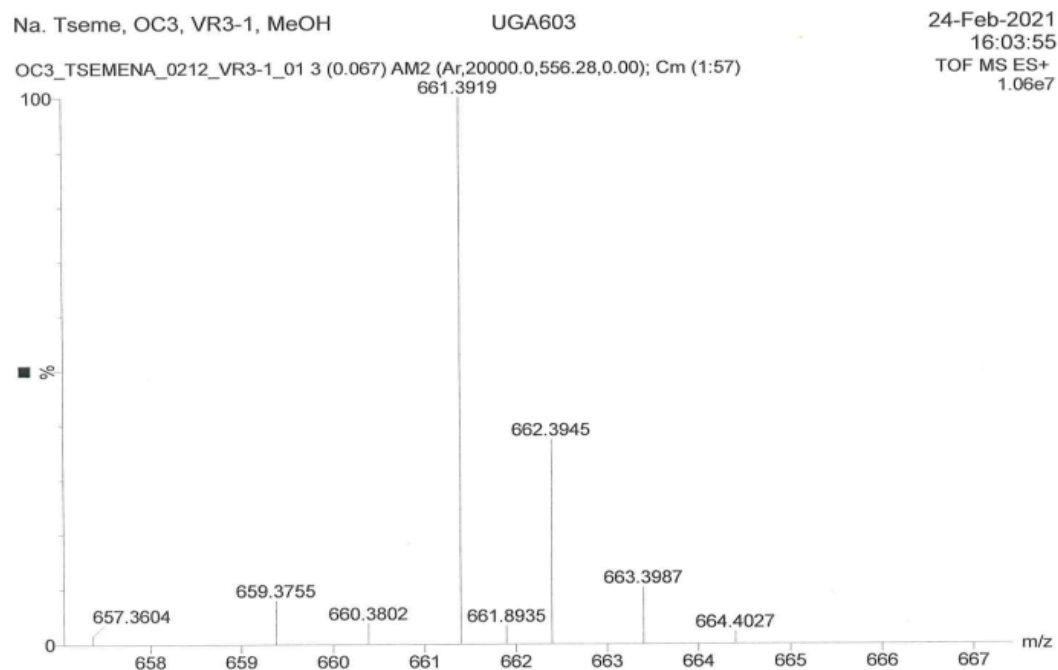

**Figure S25:** ESI-HR mass spectrum of compound **3**

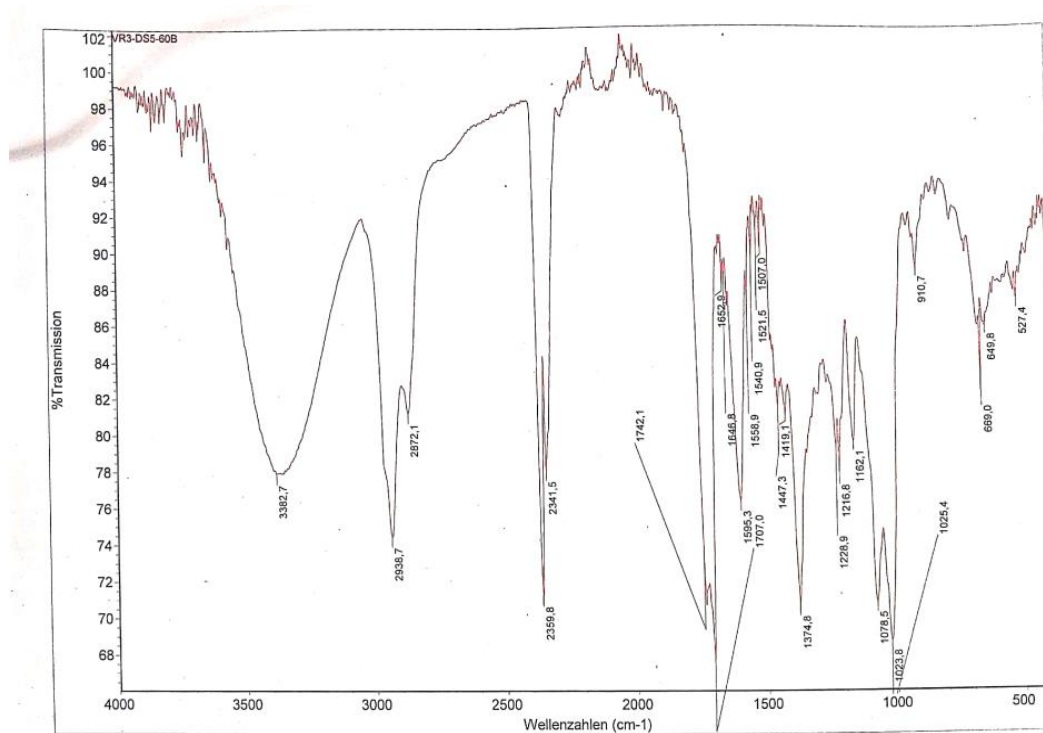

**Figure S26:** IR spectrum of compound **3**

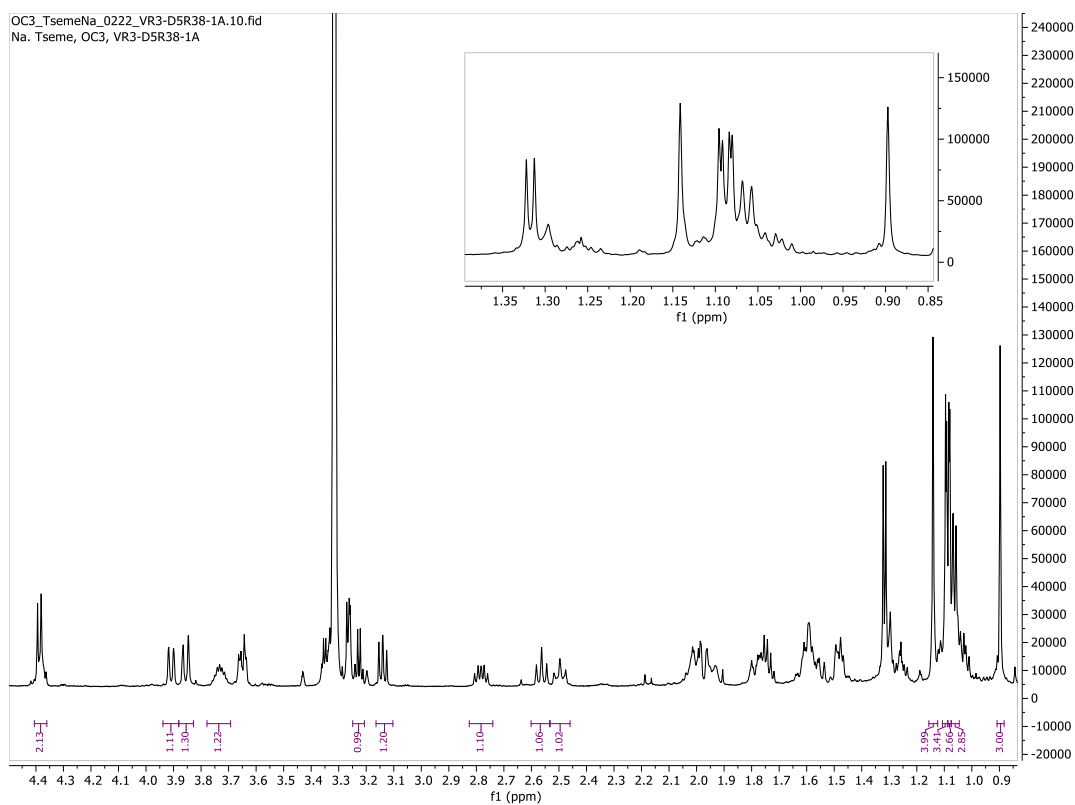

**Figure S27:**  $^1\text{H}$  NMR ( $\text{CDCl}_3$ , 600 MHz) spectrum of compound **3**

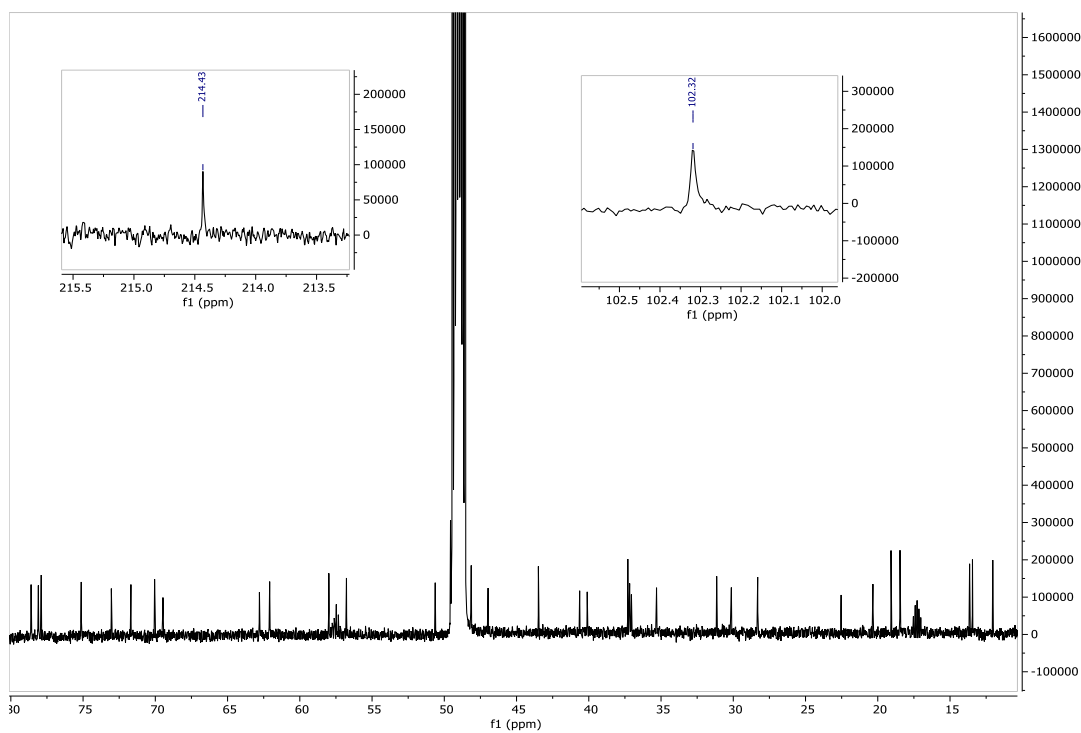

**Figure S28:**  $^{13}\text{C}$  ( $\text{CDCl}_3$ , 150 MHz) spectrum of compound **3**

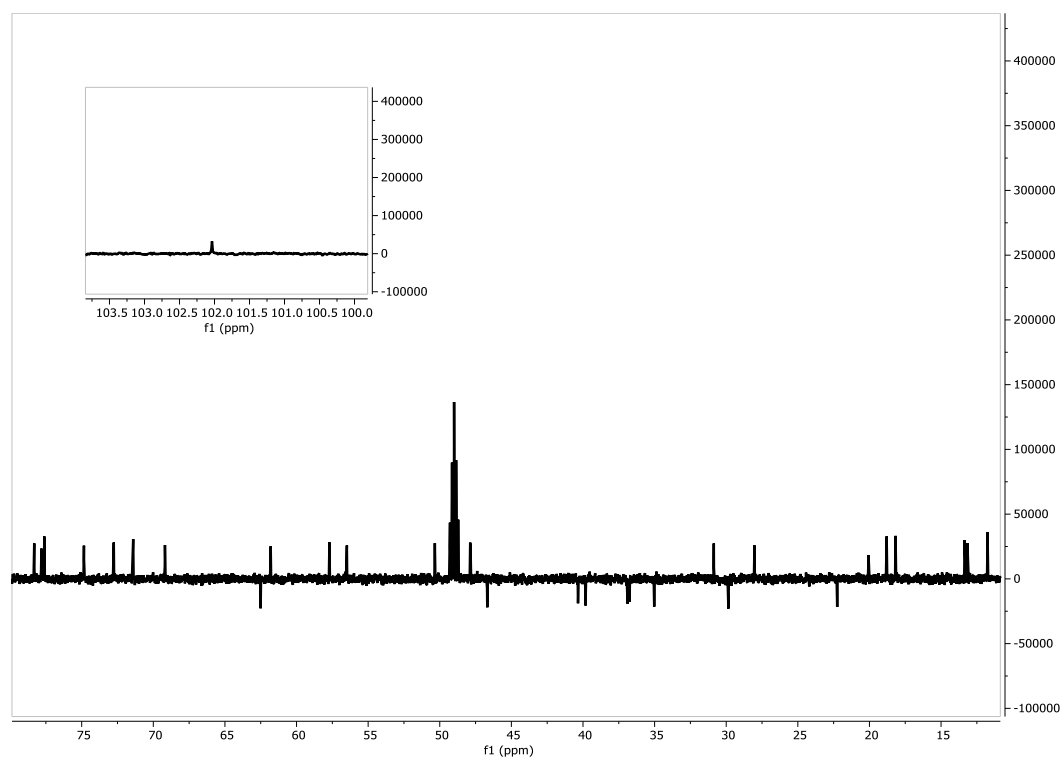

Figure S29: DEPT 135 spectrum of compound 3

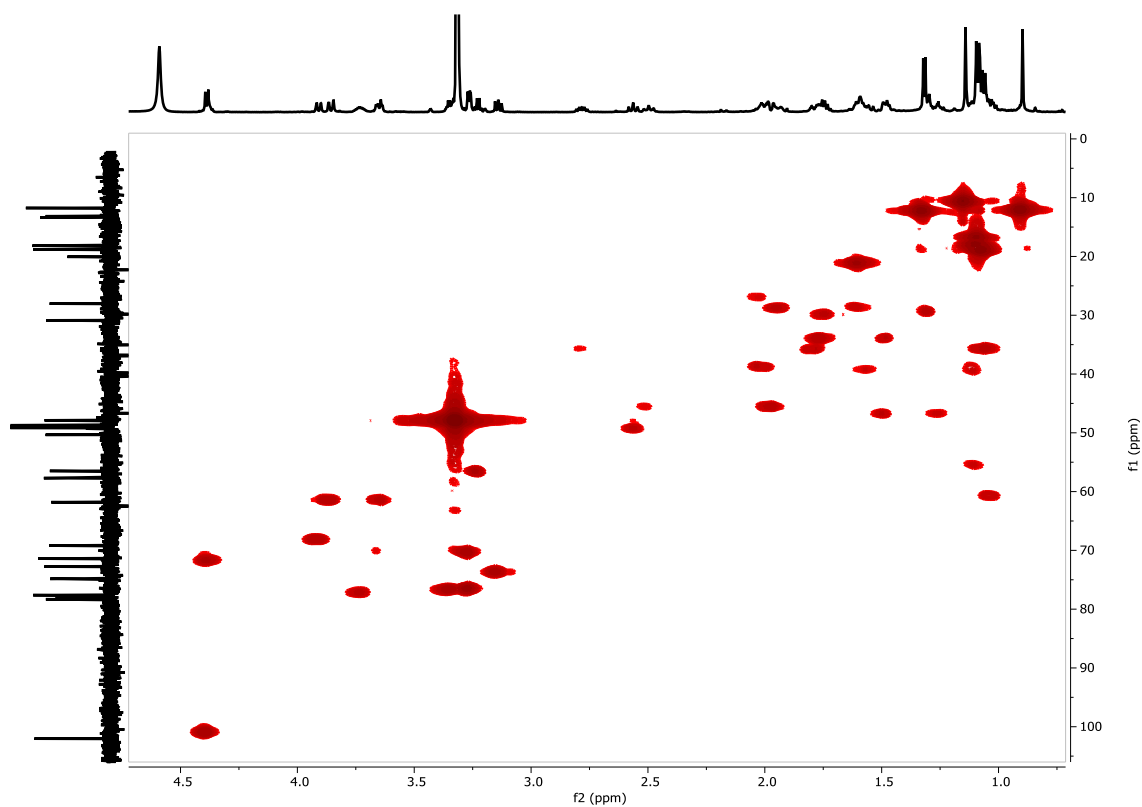

Figure S30: HSQC spectrum of compound 3

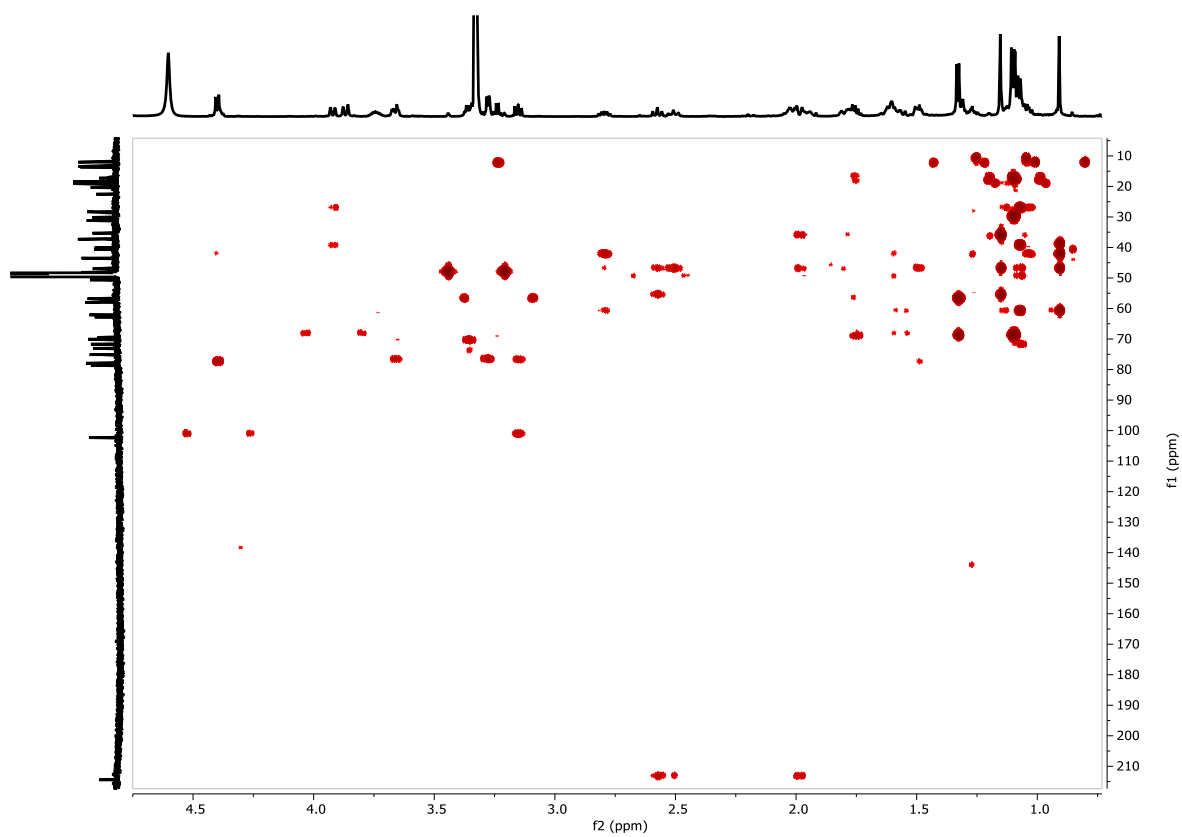

Figure S31: HMBC spectrum of compound 3

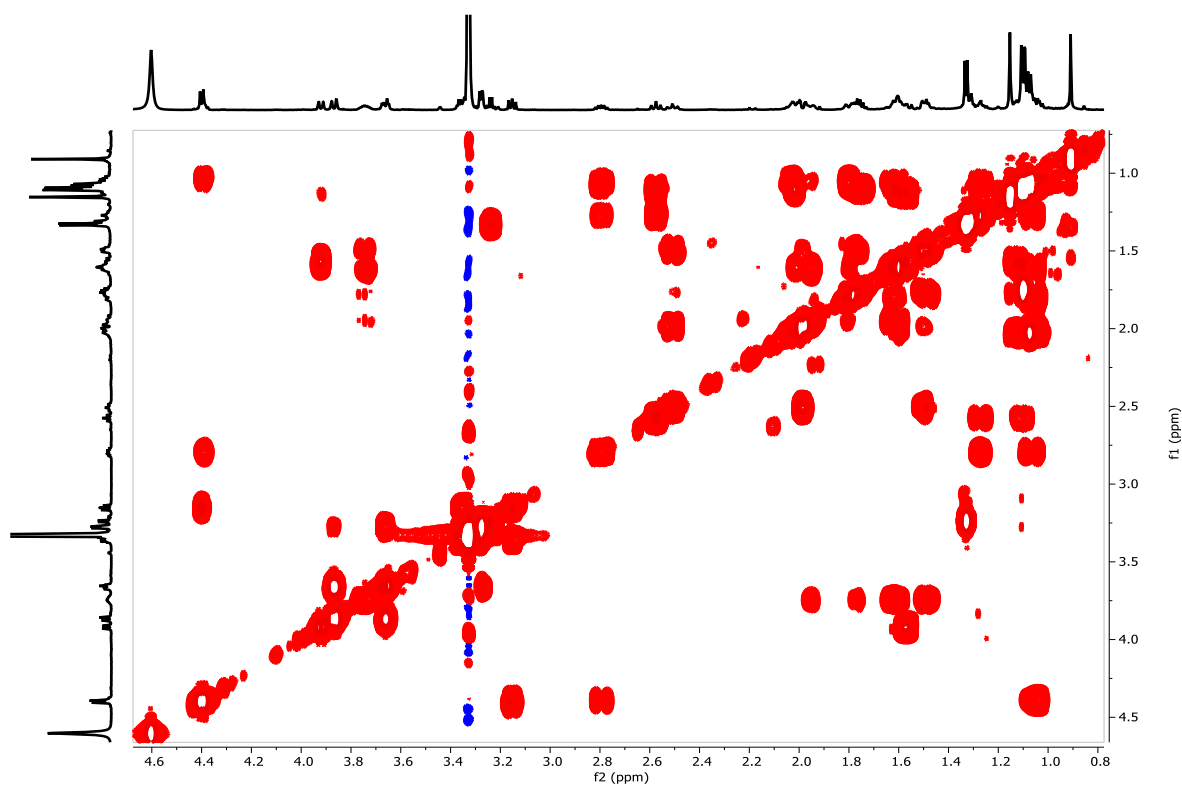

Figure S32: COSY spectrum of compound 3

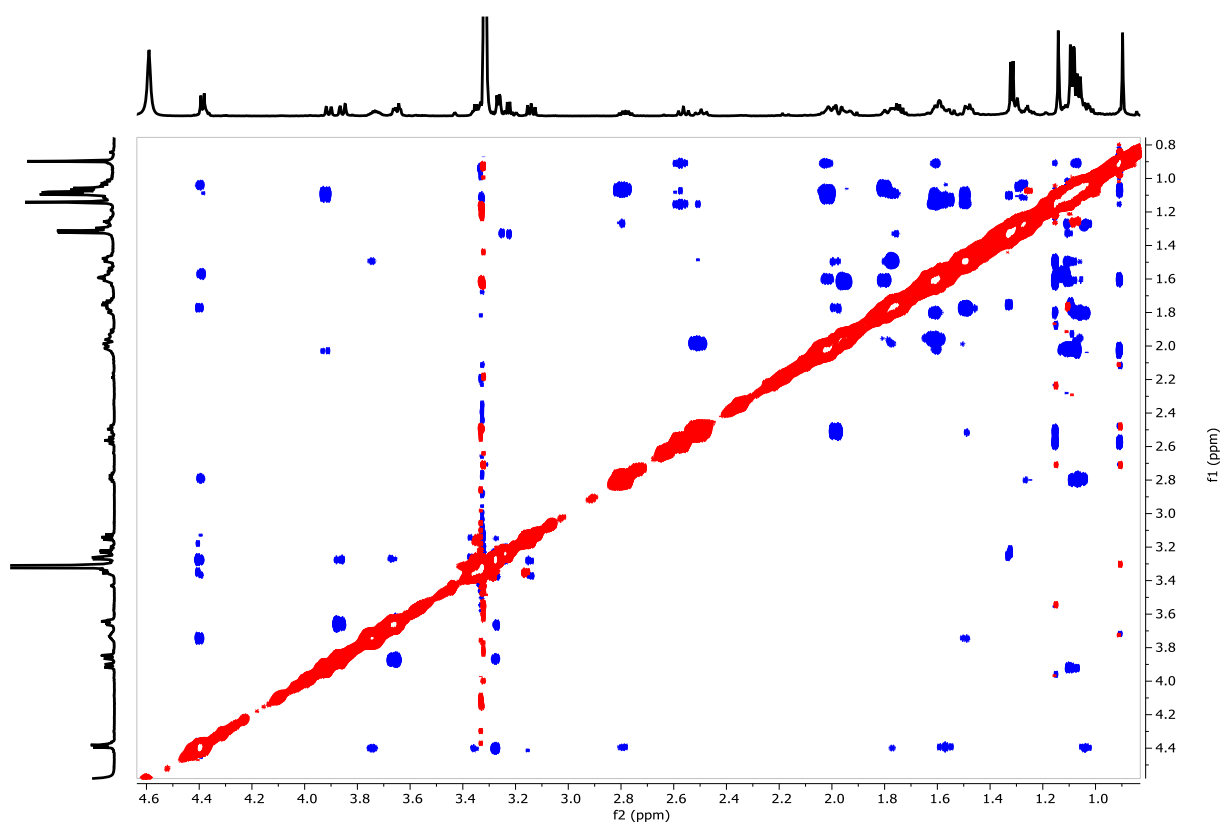

**Figure S33:** ROESY spectrum of compound 3

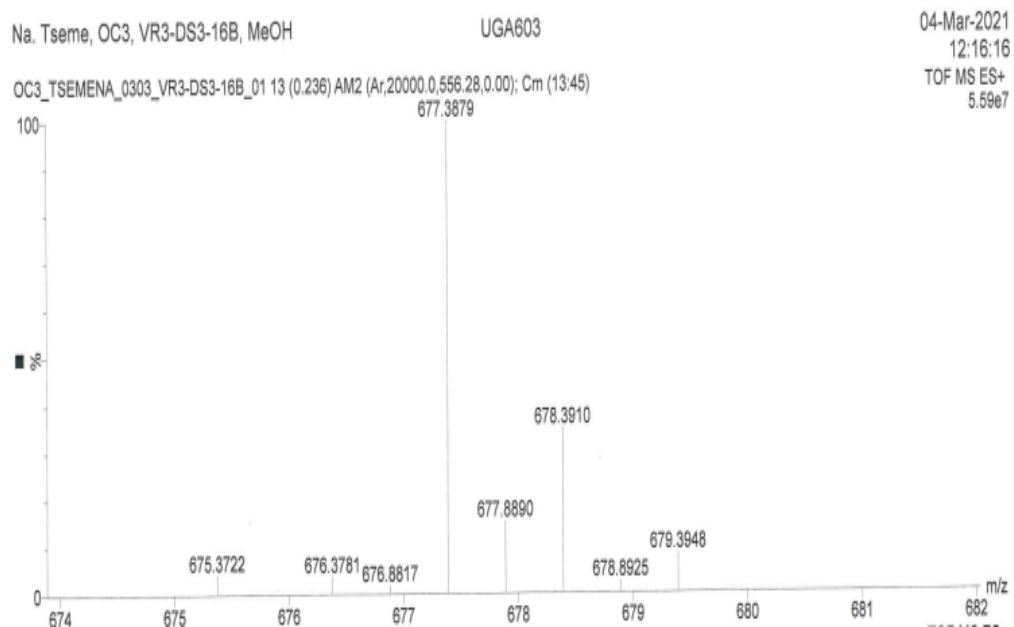

**Figure S34:** ESI-HR mass spectrum of compound 4

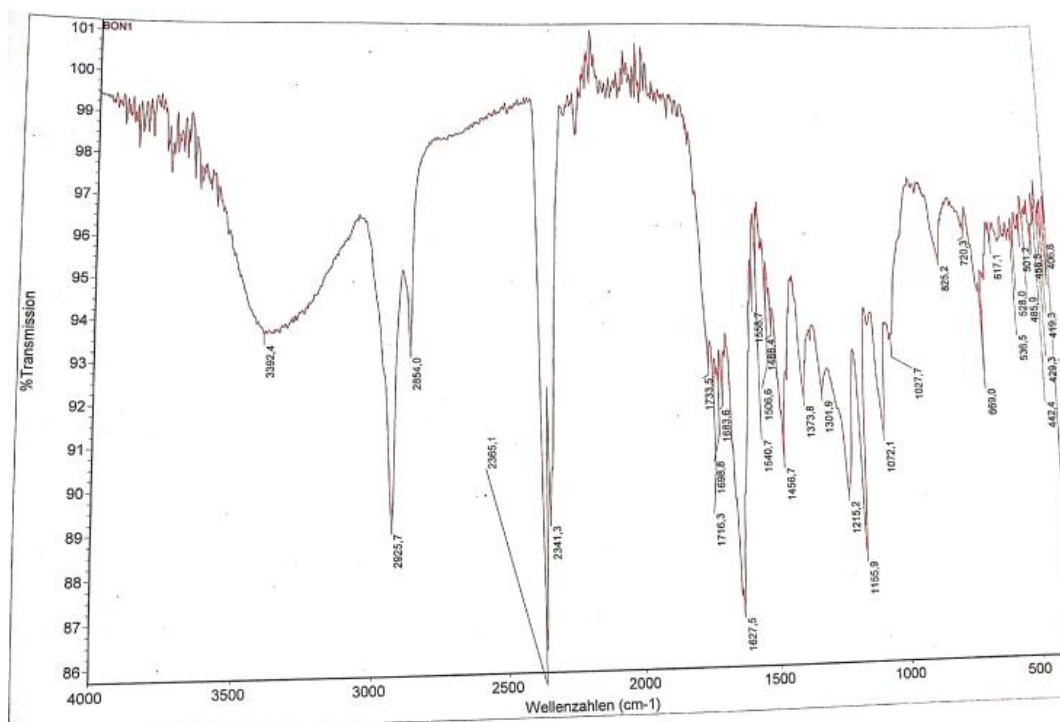

Figure S35: IR spectrum of compound 4

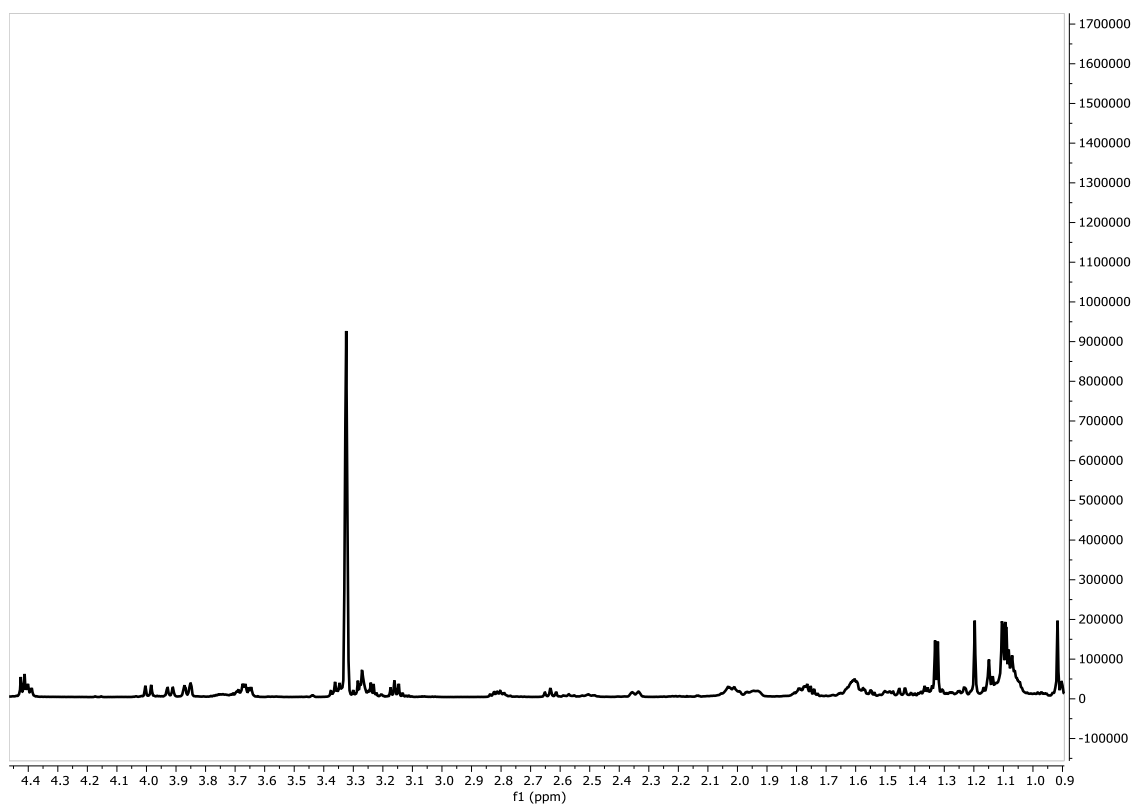

Figure S36: <sup>1</sup>H NMR (CDCl<sub>3</sub>, 500 MHz) spectrum of compound 4



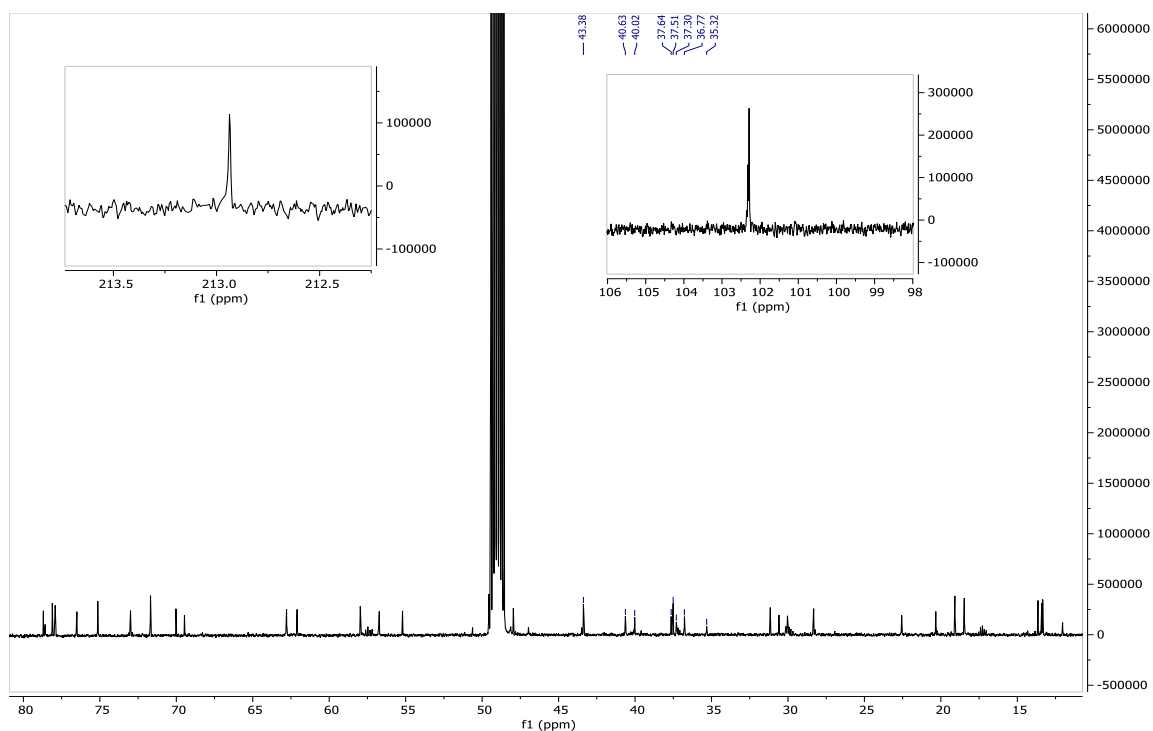

**Figure S37:**  $^{13}\text{C}$  NMR ( $\text{CDCl}_3$ , 125 MHz) spectrum of compound **4**

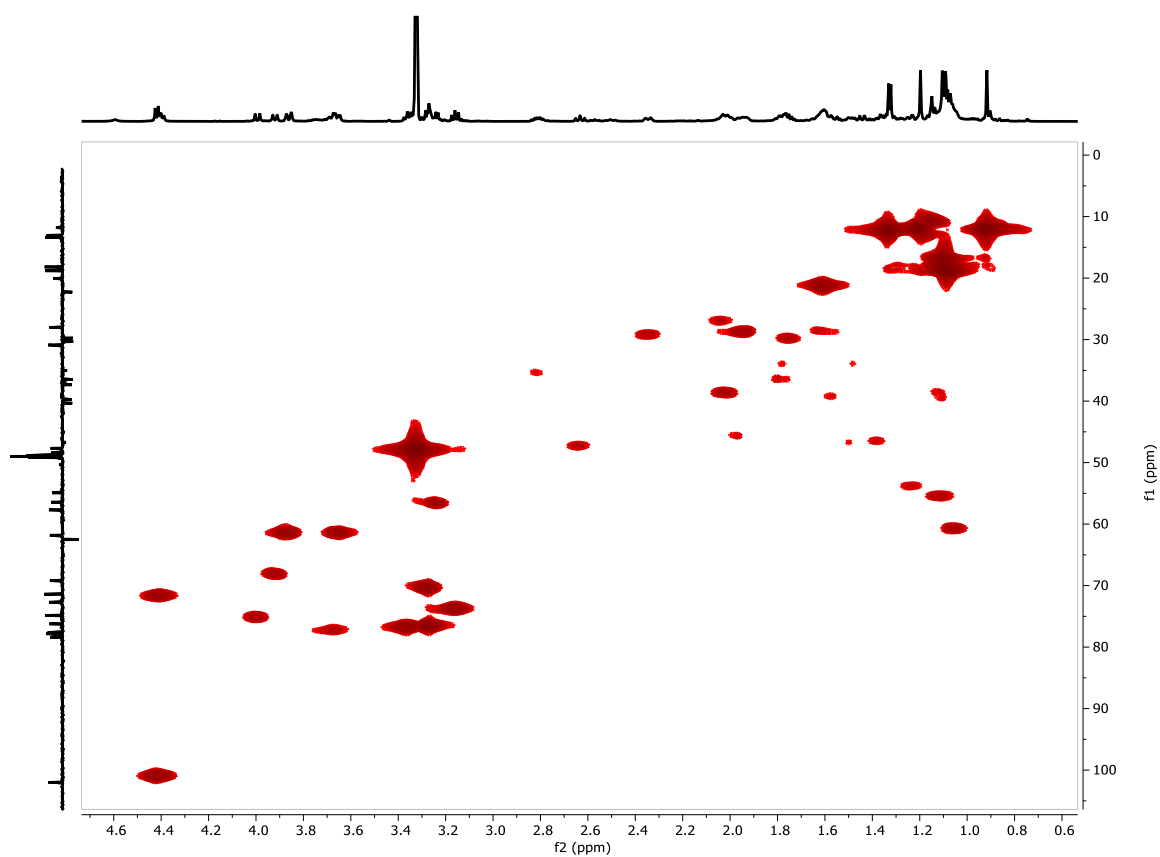

**Figure S38:** HSQC spectrum of compound **4**

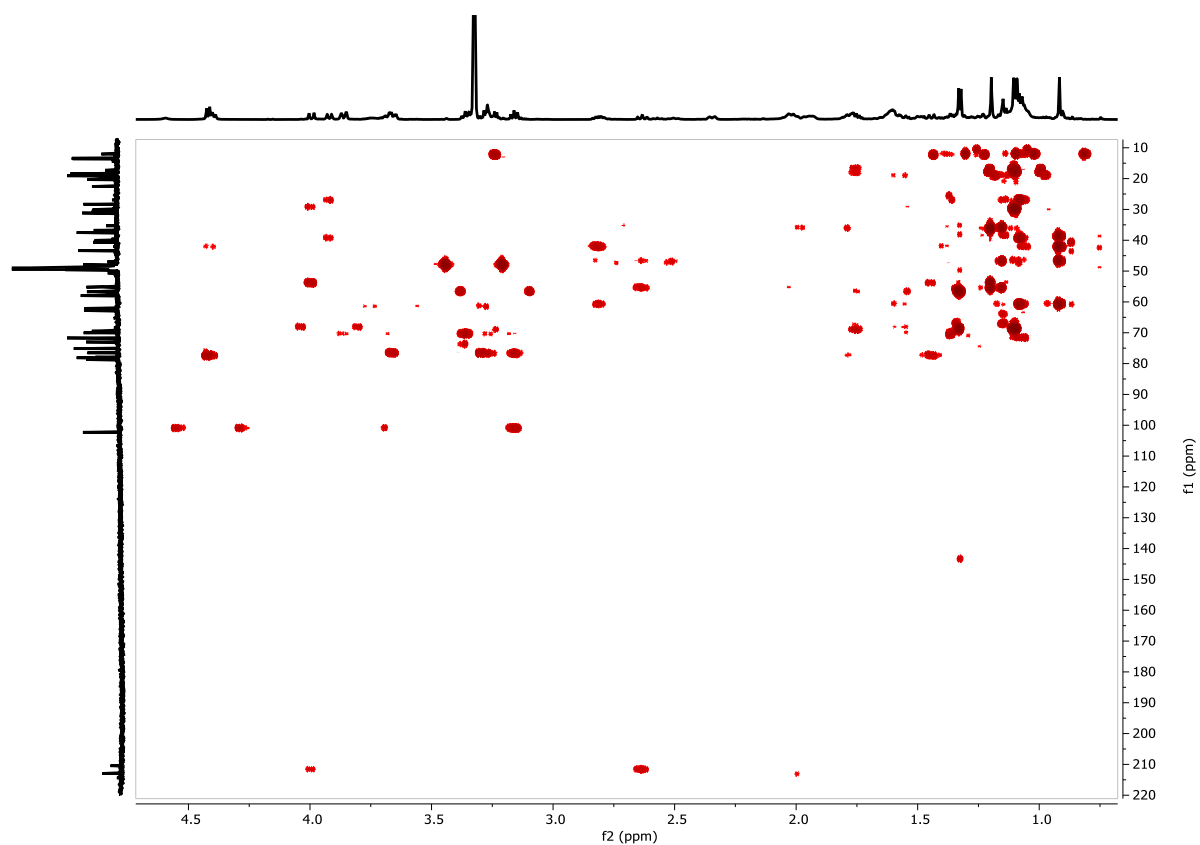

Figure S39: HMBC spectrum of compound 4

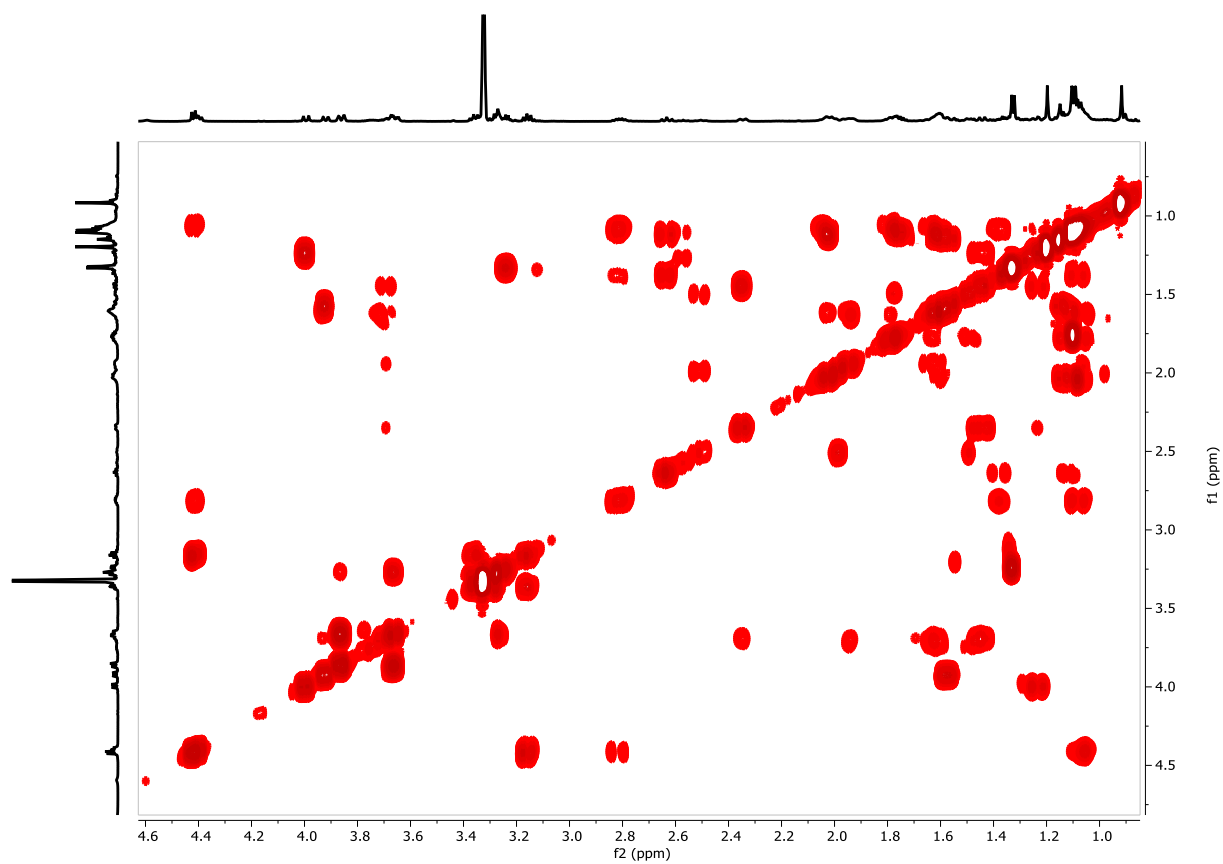

Figure S40: COSY spectrum of compound 4

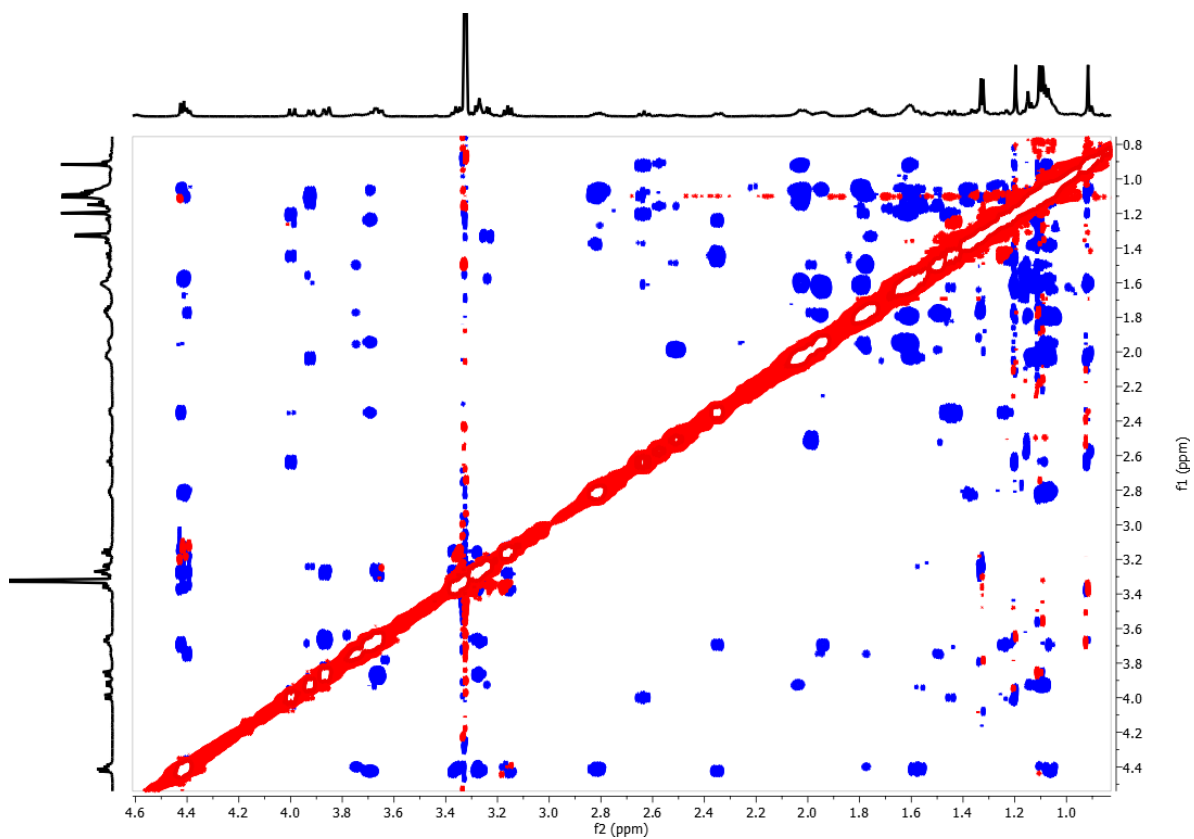

Figure S41: ROESY spectrum of compound 4

### DATA FOR KNOWN COMPOUNDS

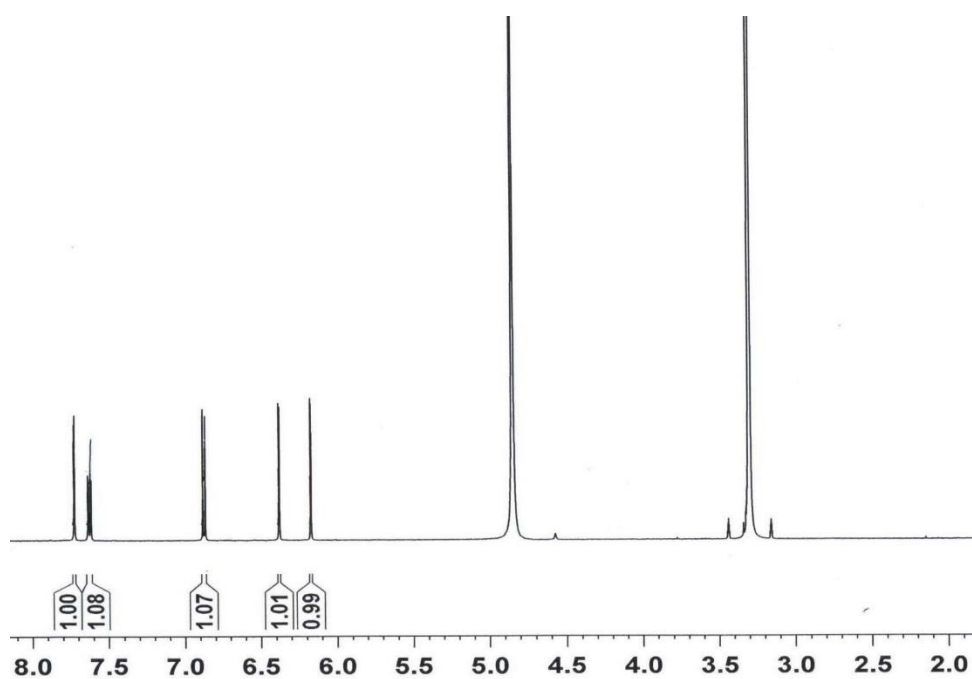

Figure S42: <sup>1</sup>H NMR (CD<sub>3</sub>OD, 500 MHz) spectrum of compound 5

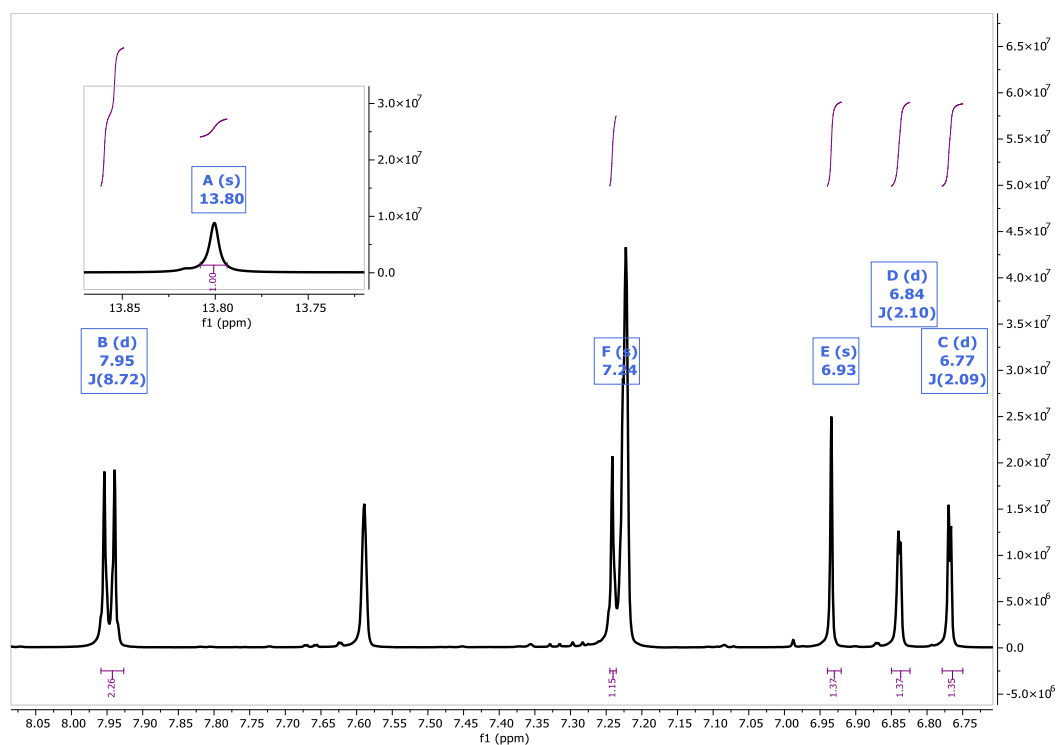

**Figure S43:**  $^1\text{H}$  NMR ( $\text{CDCl}_3$ , 500 MHz) spectrum of compound 6

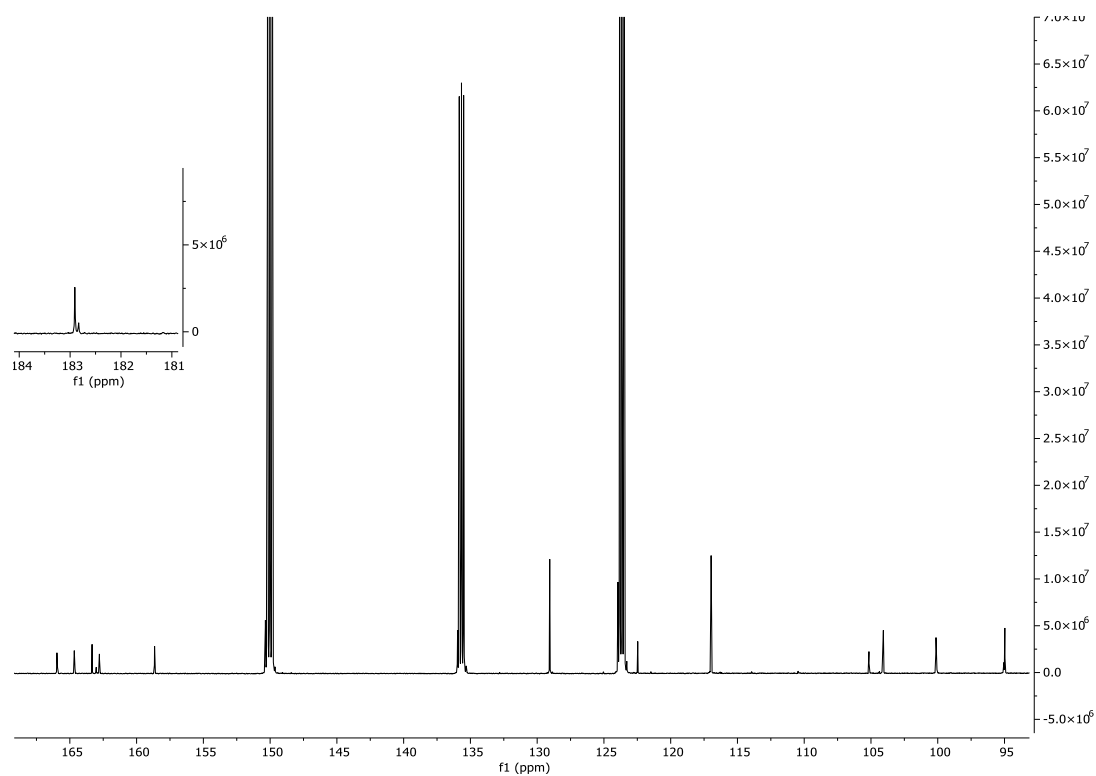

**Figure S44:**  $^{13}\text{C}$  NMR ( $\text{CDCl}_3$ , 125 MHz) spectrum of compound 6

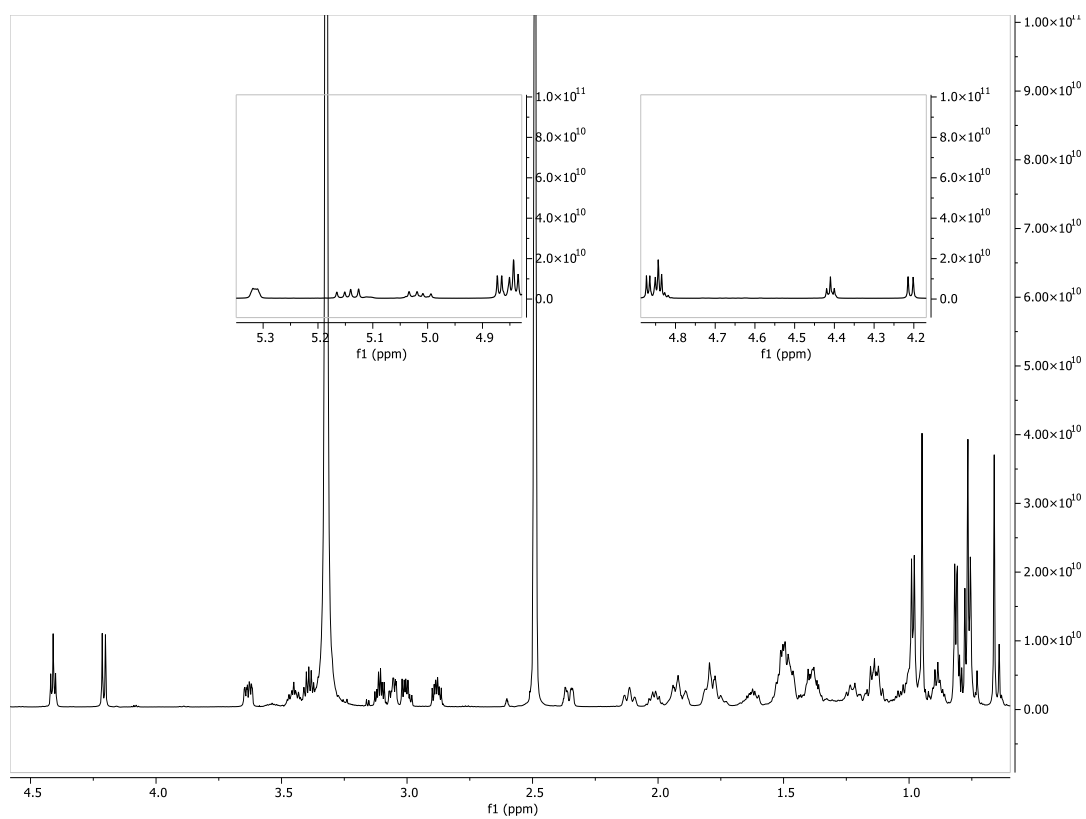

**Figure S45:**  $^1\text{H}$  NMR ( $\text{CDCl}_3$ , 500 MHz) spectrum of a mixture of 7 and 8
